# Supplementary material
Source: PubMed Central journal article supplement (PMC4317056)
Supplement: jm401919s_si_001.pdf [file jm401919s_si_001.pdf]

Discovery of a Neuroprotective Chemical, (*S*)-*N*-(3-(3,6-dibromo-9*H*-carbazol-9-yl)-2-fluoropropyl)-6-methoxypyridin-2-amine [(-)-P7C3-S243] with Improved Drug-Like Properties

*Jacinth Naidoo,<sup>†, ‡</sup> Hector De Jesus-Cortes,<sup>#, § ‡</sup> Paula Huntington,<sup>†</sup> Sandi Estill,<sup>†</sup> Loraine K. Morlock,<sup>†</sup> Ruth Starwalt,<sup>†</sup> Thomas J. Mangano,<sup>¶</sup> Noelle S. Williams,<sup>†</sup> Andrew A. Pieper,<sup>#, \*</sup> Joseph M. Ready<sup>†, \*</sup>*

<sup>†</sup> Departments of Biochemistry and <sup>§</sup>Neuroscience, University of Texas Southwestern Medical Center, 5323 Harry Hines Blvd. Dallas, Texas, 75390-9038.

<sup>#</sup> Departments of Psychiatry, Neurology, and Veterans Affairs, University of Iowa Carver College of Medicine, 200 Hawkins Ave, Iowa City, IA 52242.

<sup>¶</sup>National Institute of Mental Health Psychoactive Drug Screening Program, University of North Carolina at Chapel Hill, Chapel Hill, North Carolina.

## Supplementary Information

### Contents:

|                                                        |    |
|--------------------------------------------------------|----|
| Fig S1: survival vs proliferation                      | 2  |
| Fig S2: X-ray crystal structure of (-)-(S)-P7C3-S243   | 3  |
| Fig S3: Comparison of PK for racemic and (-)-P7C3-S243 | 3  |
| Table 1: Psychoactive drug screening results           | 4  |
| <sup>1</sup> H and <sup>13</sup> C NMR spectra         | 6  |
| HPLC traces                                            | 22 |

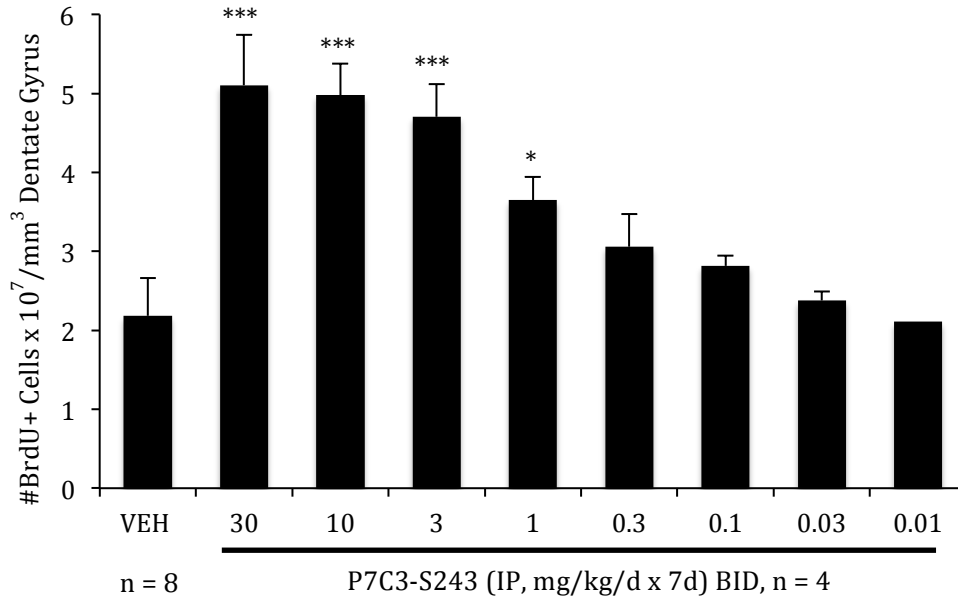

**Figure S1.** Adult mice were administered a bolus of BrdU (150 mg/kg) to label newborn neurons, and 24 hours later, twice-daily IP treatment was begun with vehicle or compound for 7 days. At the end of the 7 days, the number of surviving BrdU-labeled neurons was quantified. Importantly, under the conditions of this experiment, newborn neurons were labeled prior to exposure to drug, so any increase in number of neurons can be attributed to neuroprotective activity rather than proliferative effects. P7C3-S243 showed protection down to 1 mg/kg/day dose. Data shown are mean +/- SEM. P values are shown for comparison to VEH treated group, and were obtained by one-way ANOVA with Dunnet's post-hoc test, using GraphPad Prism 5.0. Asterisks indicate  $p < 0.01$  (\*) or  $p < 0.0001$  (\*\*\*)

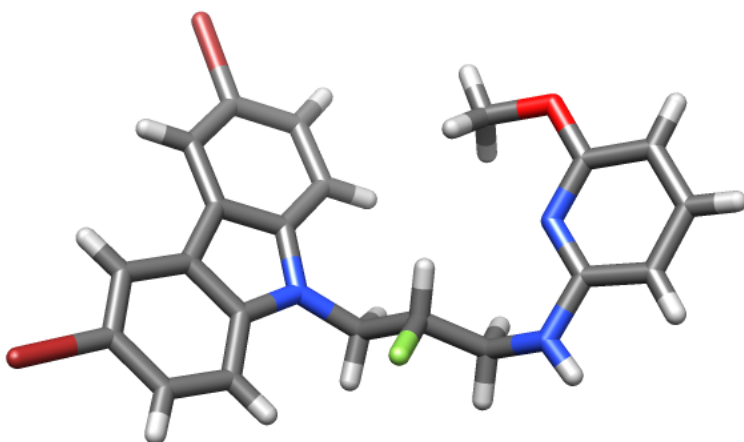

**Fig S2.** X-ray crystal structure of (-)-(S)-P7C3-S243

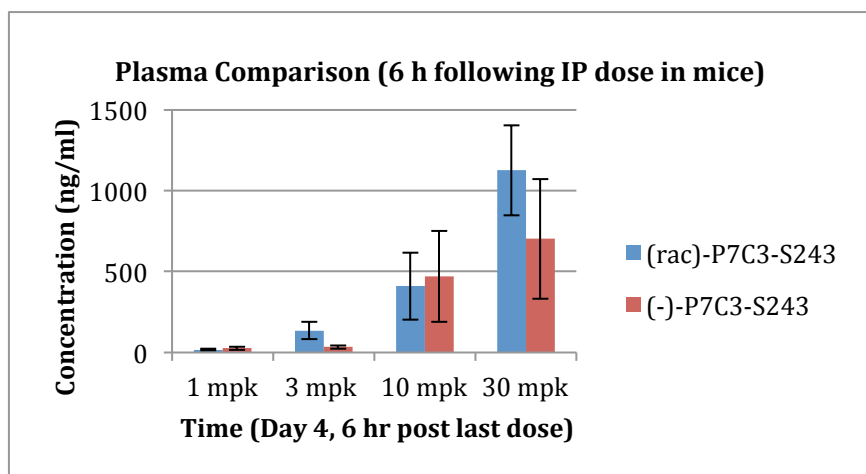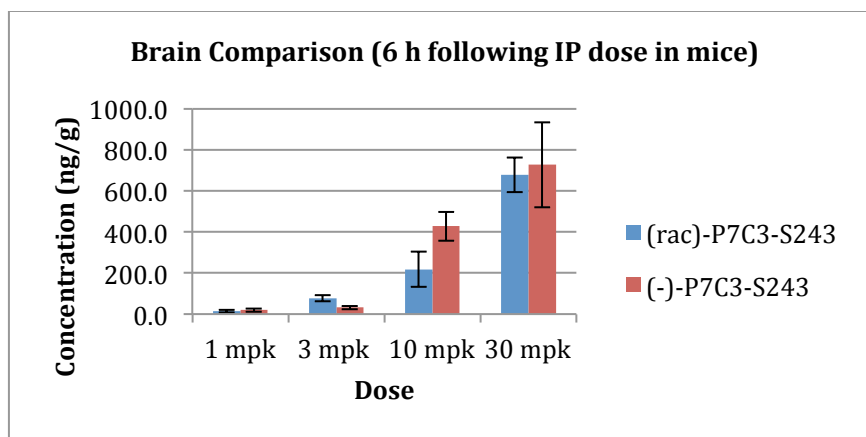

**Figure S3.** Comparison of brain levels of optically active and racemic 15 (P7C3-S243) 6 h after an IP dose at the indicated amounts (mpk = mg/kg). No difference is observed between racemic and optically active compound.

**Table S1.** Results from Psychoactive Drug Screening Program. Values represent Ki in nM in competition assays. Empty cells indicate Ki > 10,000 nM in dose-response experiments or <50% inhibition when tested at 10,000 nM.

|                           | <b>PDSP Code:</b>    | 29845                | 29846    | 29848    | 29849    |  |
|---------------------------|----------------------|----------------------|----------|----------|----------|--|
|                           | <b>Cmpd Name:</b>    | P7C3                 | P7C3 A20 | (-)-S243 | (+)-S243 |  |
| <b>Receptor Code</b>      | <b>Receptor</b>      | <b>Ki (nM)</b>       |          |          |          |  |
| <b>5-HT1A</b>             | Serotonin receptors  |                      |          |          |          |  |
| <b>5-HT1B</b>             |                      |                      |          |          |          |  |
| <b>5-HT1D</b>             |                      | 2595                 | 2334     |          |          |  |
| <b>5-ht1e</b>             |                      |                      |          |          |          |  |
| <b>5-HT2A</b>             |                      |                      |          |          |          |  |
| <b>5-HT2B</b>             |                      |                      |          |          | 4327     |  |
| <b>5-HT2C</b>             |                      |                      |          |          |          |  |
| <b>5-HT3</b>              |                      |                      |          |          |          |  |
| <b>5-ht5a</b>             |                      |                      |          |          |          |  |
| <b>5-HT6</b>              |                      |                      |          |          |          |  |
| <b>5-HT7</b>              |                      |                      |          |          | 1857     |  |
| <b>Alpha1A</b>            |                      | Adrenergic receptors |          |          |          |  |
| <b>Alpha1B</b>            |                      |                      |          |          |          |  |
| <b>Alpha1D</b>            |                      |                      |          |          |          |  |
| <b>Alpha2A</b>            |                      |                      |          |          |          |  |
| <b>Alpha2B</b>            |                      |                      |          |          |          |  |
| <b>Alpha2C</b>            | > 8606               |                      |          |          |          |  |
| <b>Beta1</b>              |                      |                      |          |          |          |  |
| <b>Beta2</b>              |                      |                      |          |          |          |  |
| <b>Beta3</b>              |                      |                      |          |          |          |  |
| <b>AMPA</b>               | Glutamate receptor   |                      |          |          |          |  |
| <b>KA</b>                 |                      |                      |          |          |          |  |
| <b>BZP Rat Brain Site</b> | GABA receptor        | > 8246               |          |          |          |  |
| <b>GABAA</b>              |                      |                      |          |          |          |  |
| <b>D1</b>                 | Dopamine receptor    |                      |          |          |          |  |
| <b>D3</b>                 |                      |                      |          |          |          |  |
| <b>D4</b>                 |                      |                      |          |          |          |  |
| <b>D5</b>                 |                      |                      |          |          |          |  |
| <b>DAT</b>                |                      | Transporters         |          |          |          |  |
| <b>NET</b>                | 226                  |                      | 1075     |          |          |  |
| <b>SERT</b>               |                      |                      |          |          |          |  |
| <b>DOR</b>                | Opiate receptors     |                      |          |          |          |  |
| <b>KOR</b>                |                      |                      |          |          |          |  |
| <b>MOR</b>                |                      |                      |          | > 8231   |          |  |
| <b>H1</b>                 | Histamine receptor   |                      |          |          |          |  |
| <b>H3</b>                 |                      |                      |          |          |          |  |
| <b>M1</b>                 | Muscarinic receptors |                      |          |          |          |  |
| <b>M2</b>                 |                      |                      |          |          |          |  |

|                |                                    |        |            |     |     |
|----------------|------------------------------------|--------|------------|-----|-----|
| <b>M3</b>      |                                    |        |            |     |     |
| <b>M4</b>      |                                    |        |            |     |     |
| <b>M5</b>      |                                    | > 8049 |            |     |     |
| <b>NMDA</b>    |                                    |        |            |     |     |
| <b>PBR</b>     | Peripheral benzodiazepine receptor | 2352   | 1972 ± 823 | 350 | 675 |
| <b>Sigma 1</b> |                                    |        |            |     |     |
| <b>Sigma 2</b> |                                    | 7985   |            |     |     |

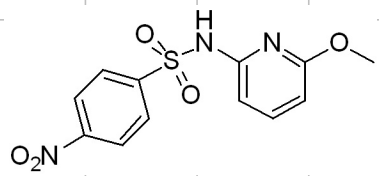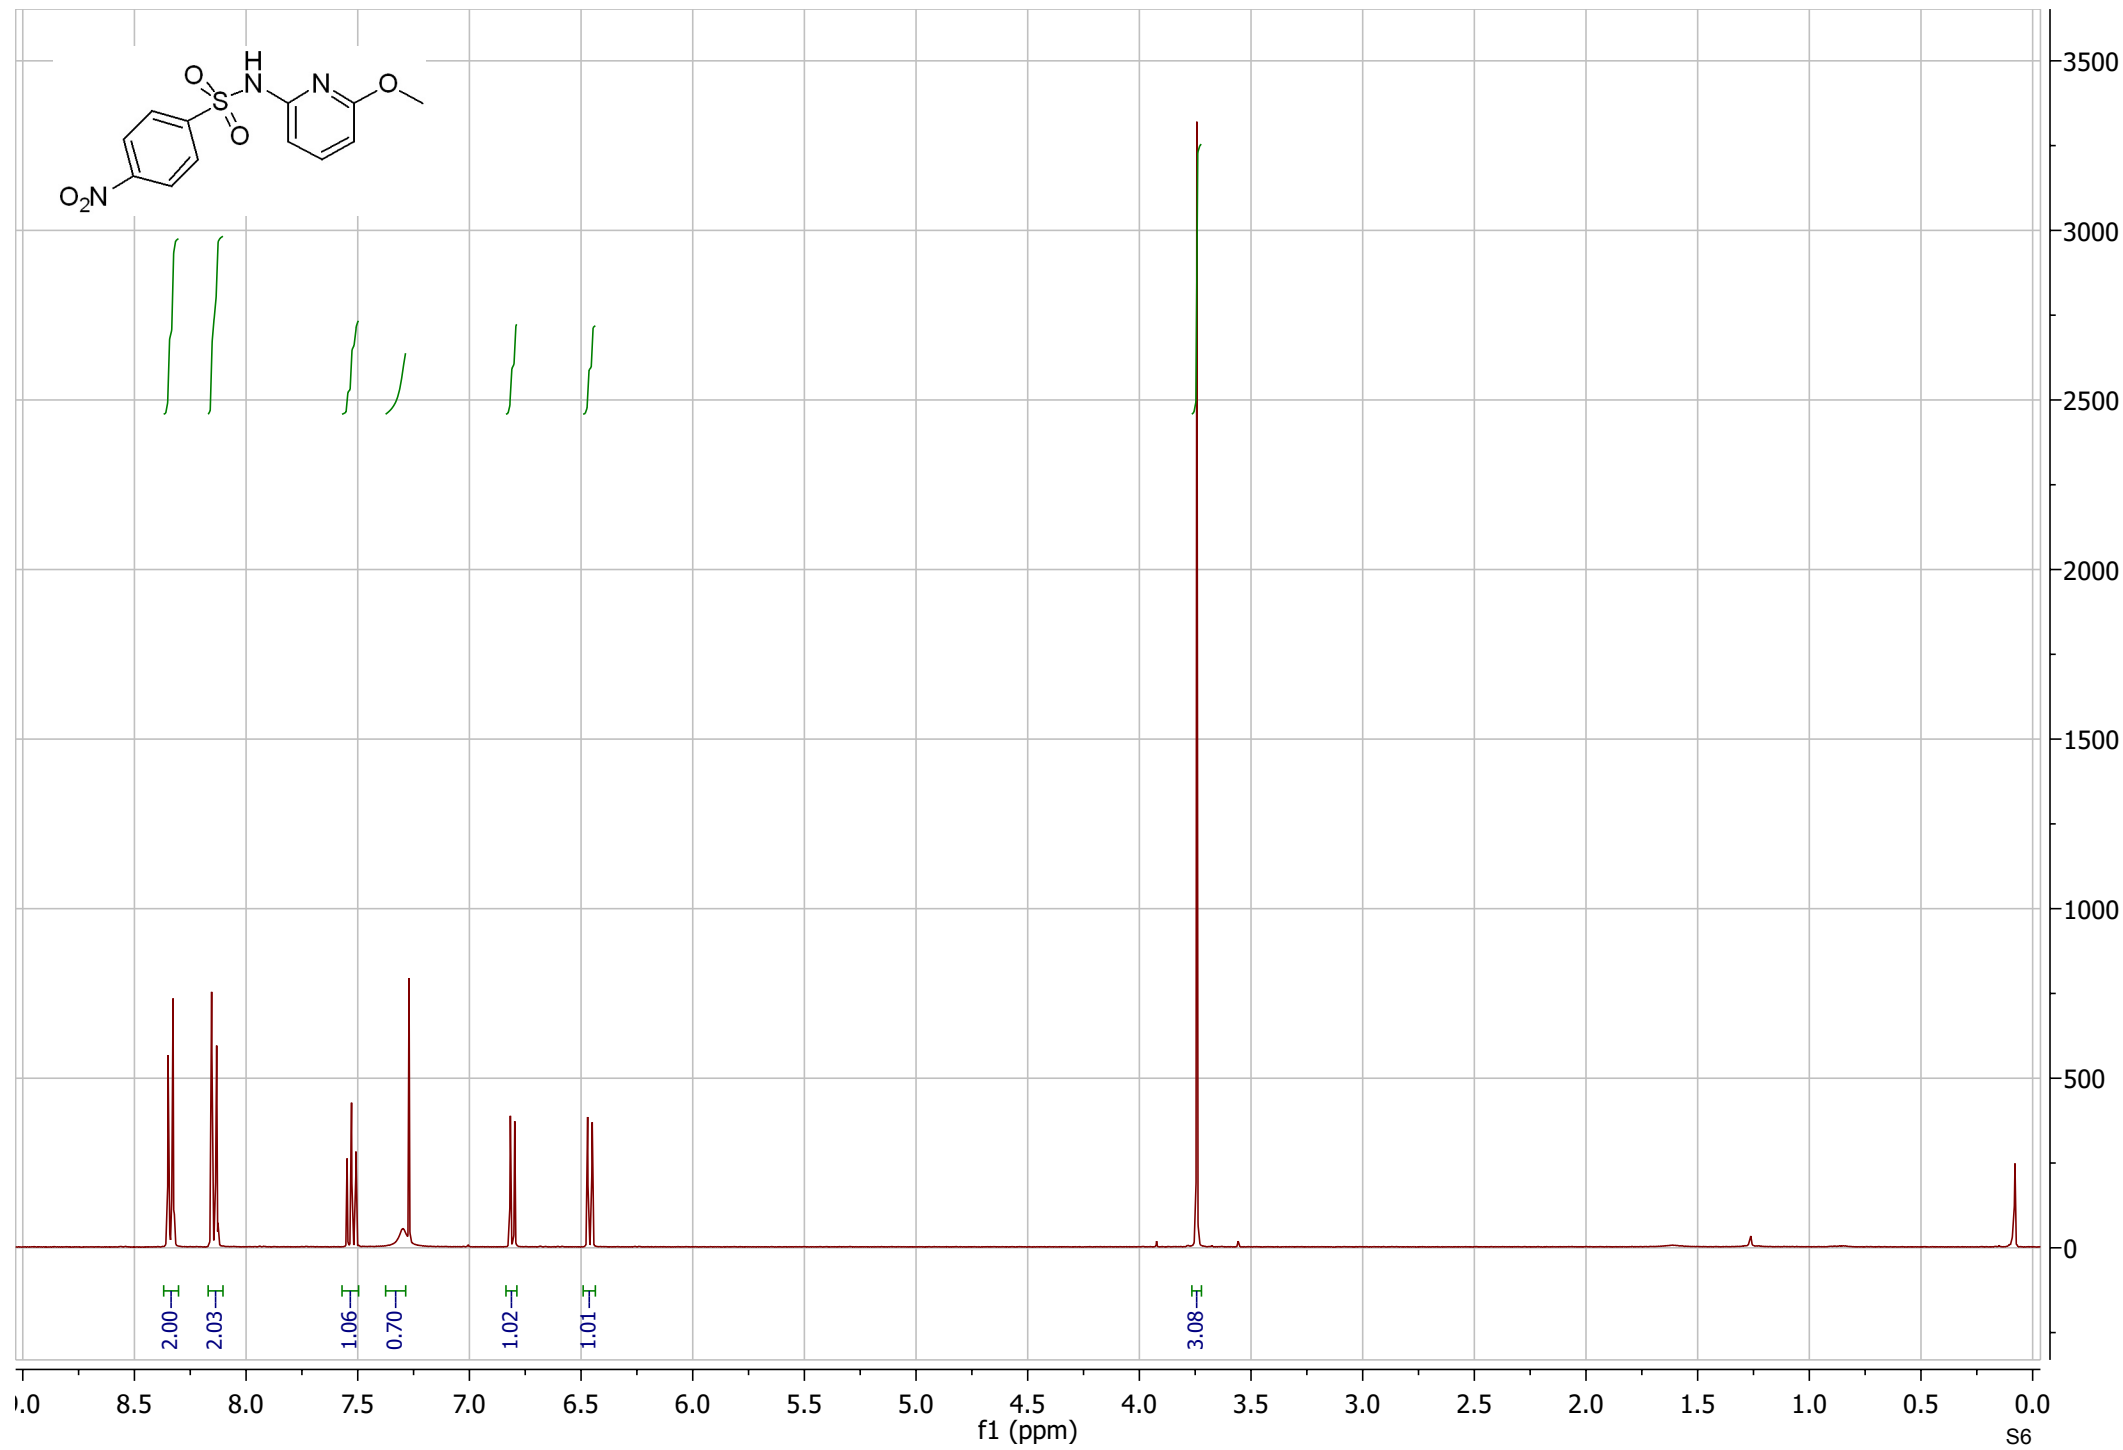

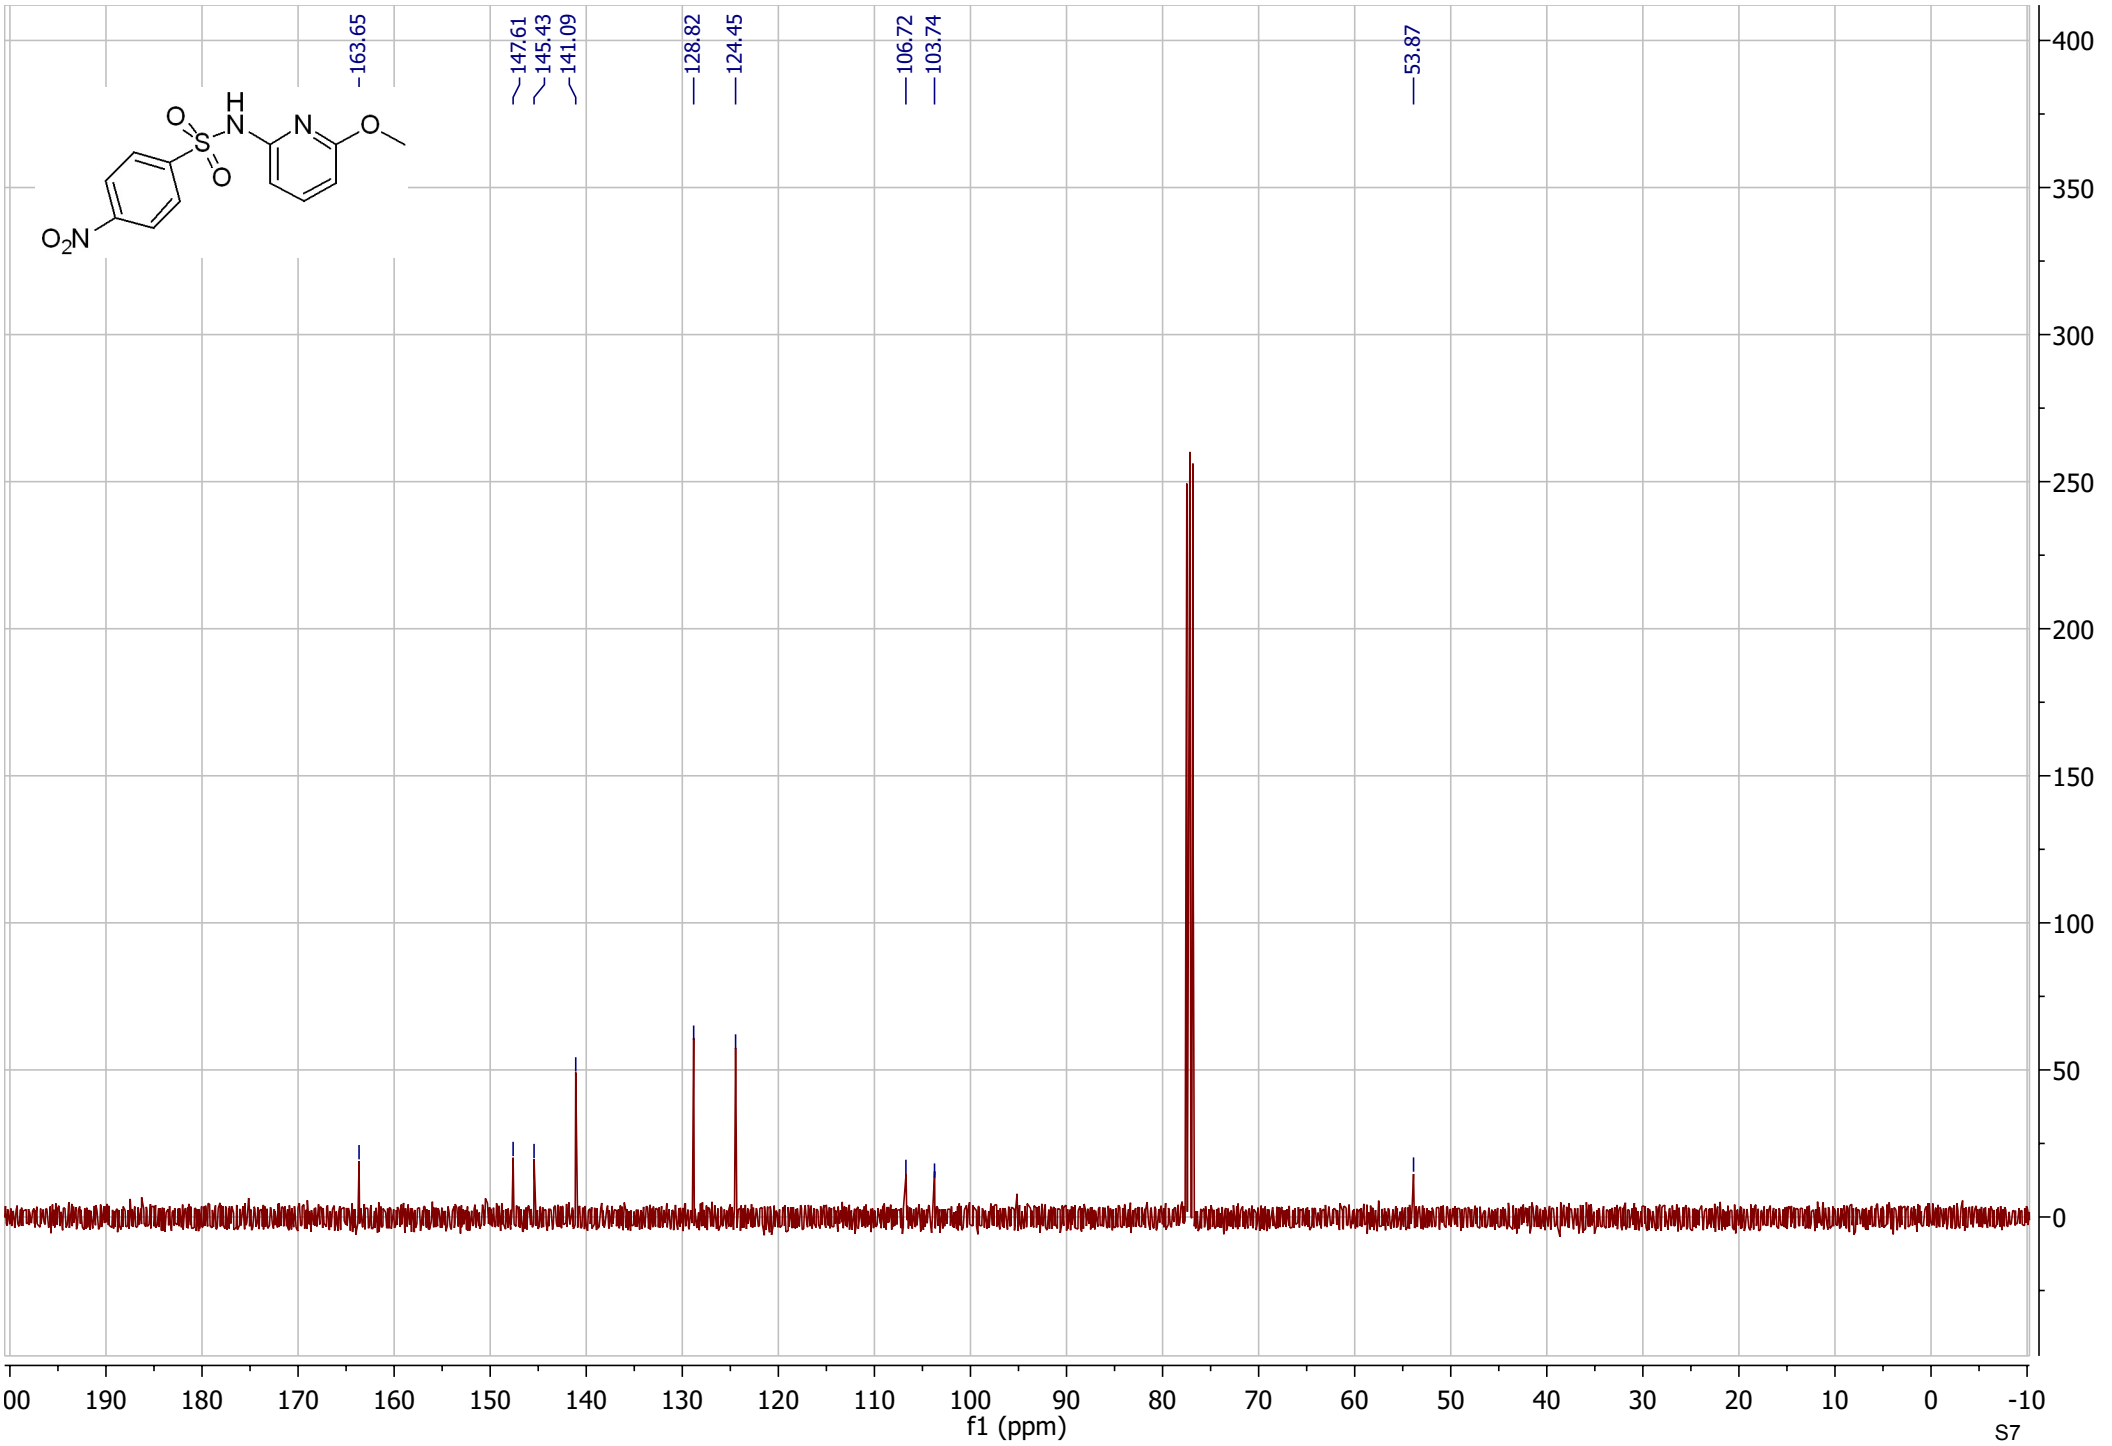

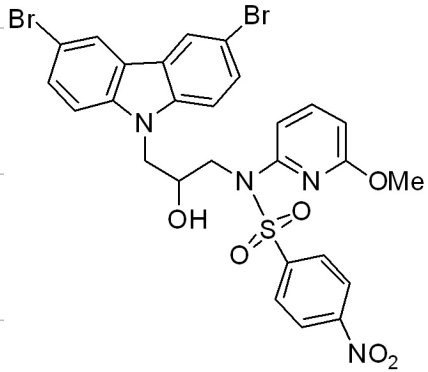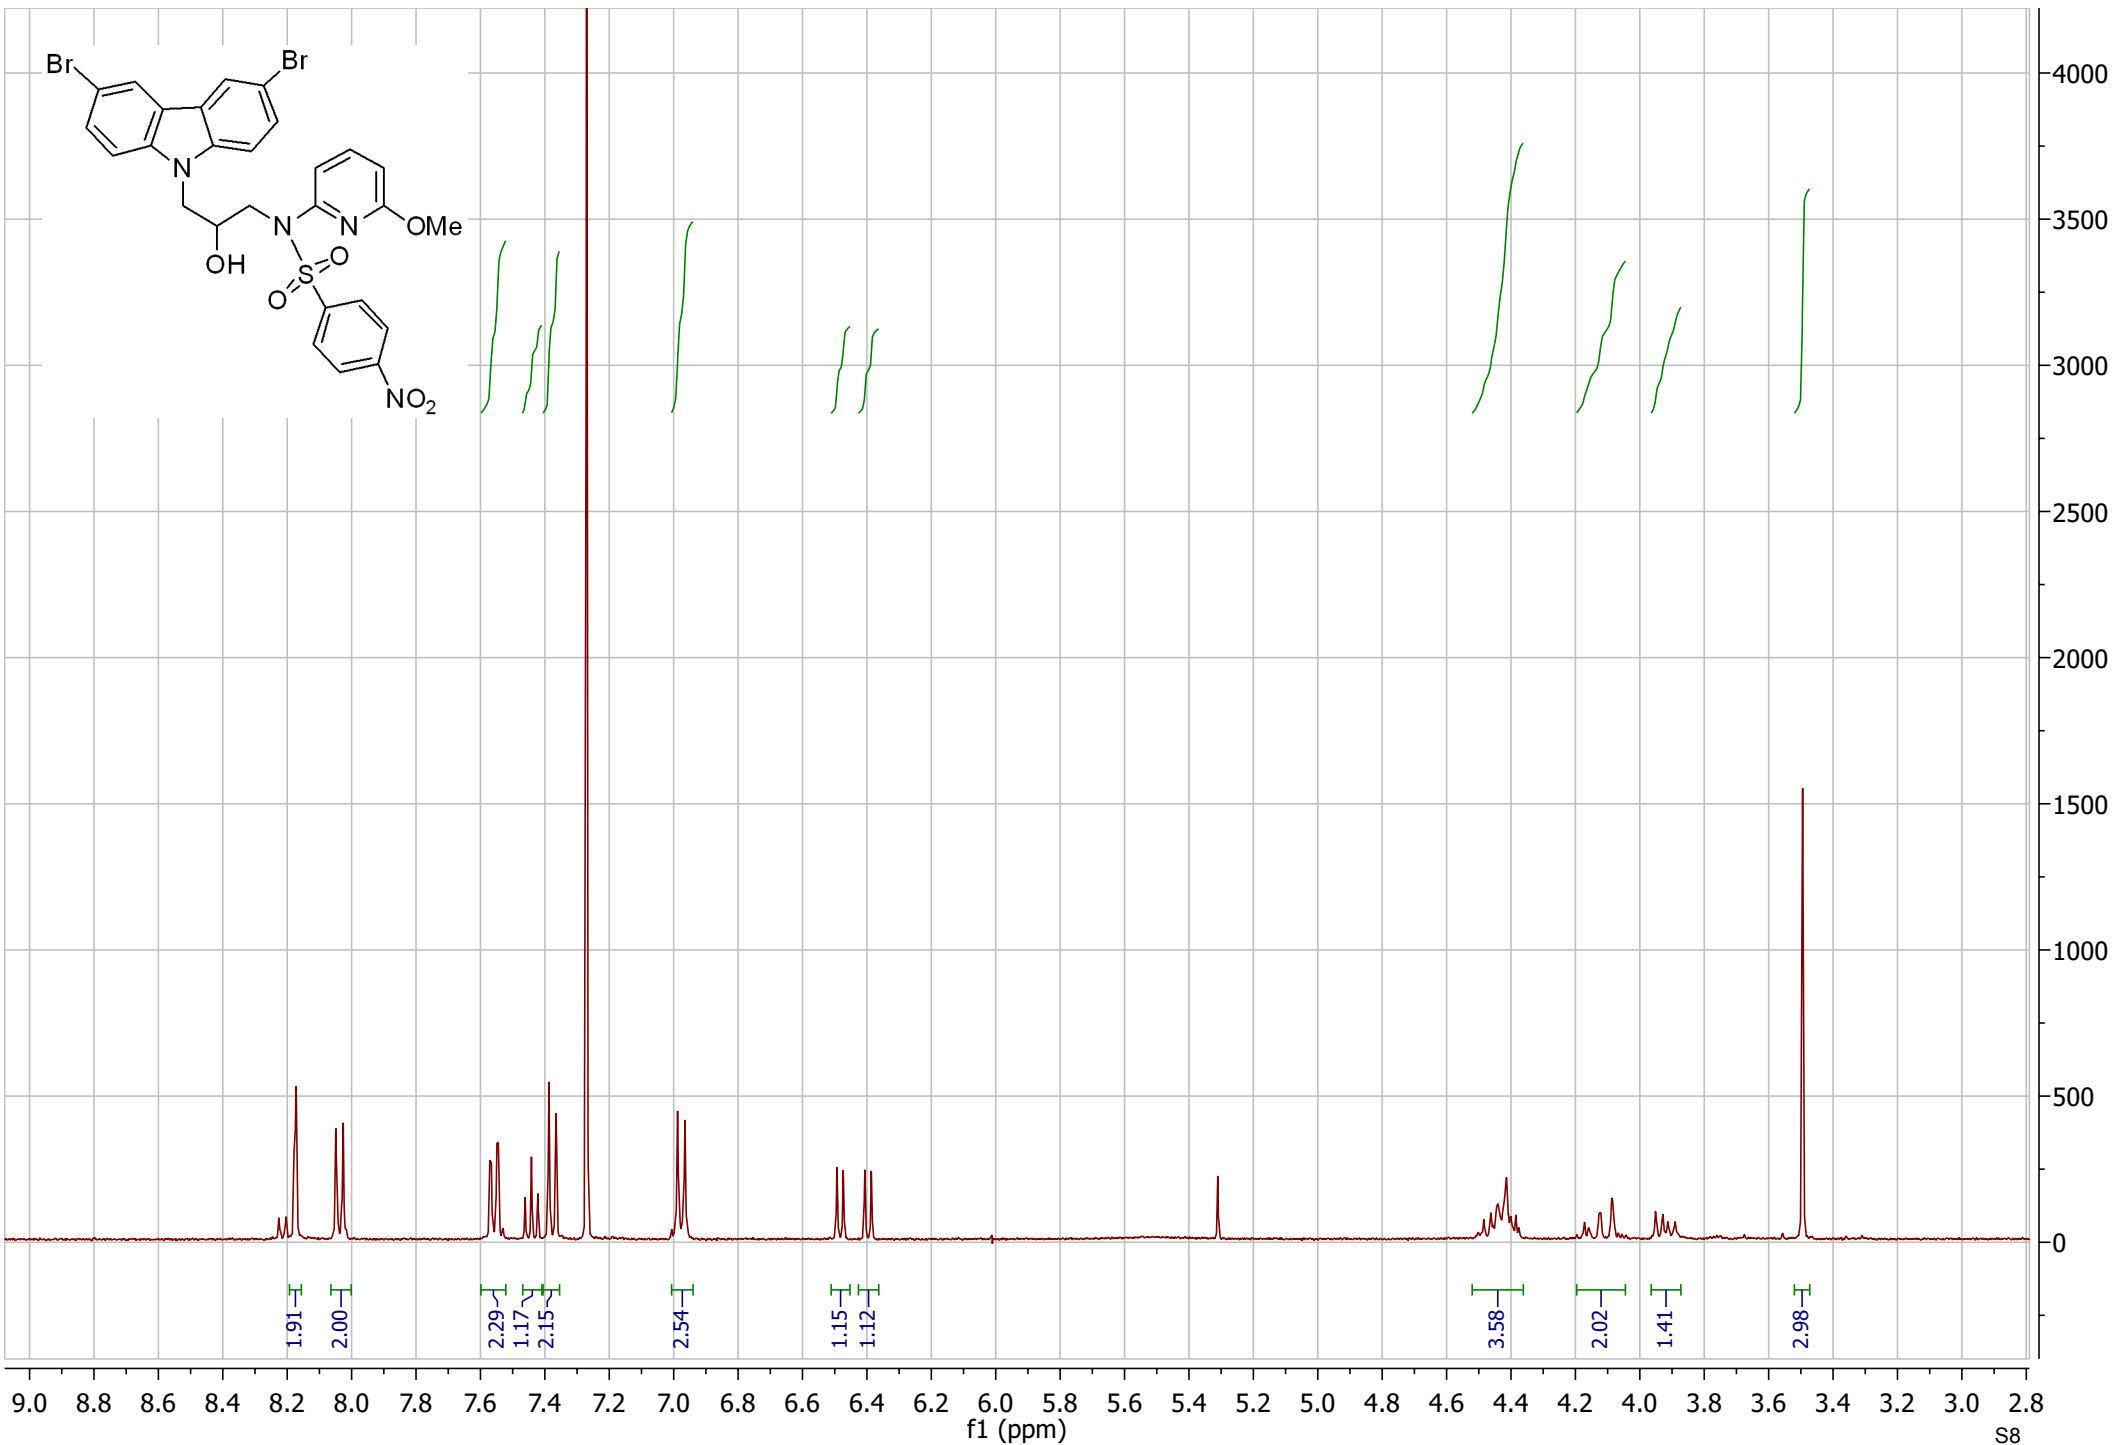



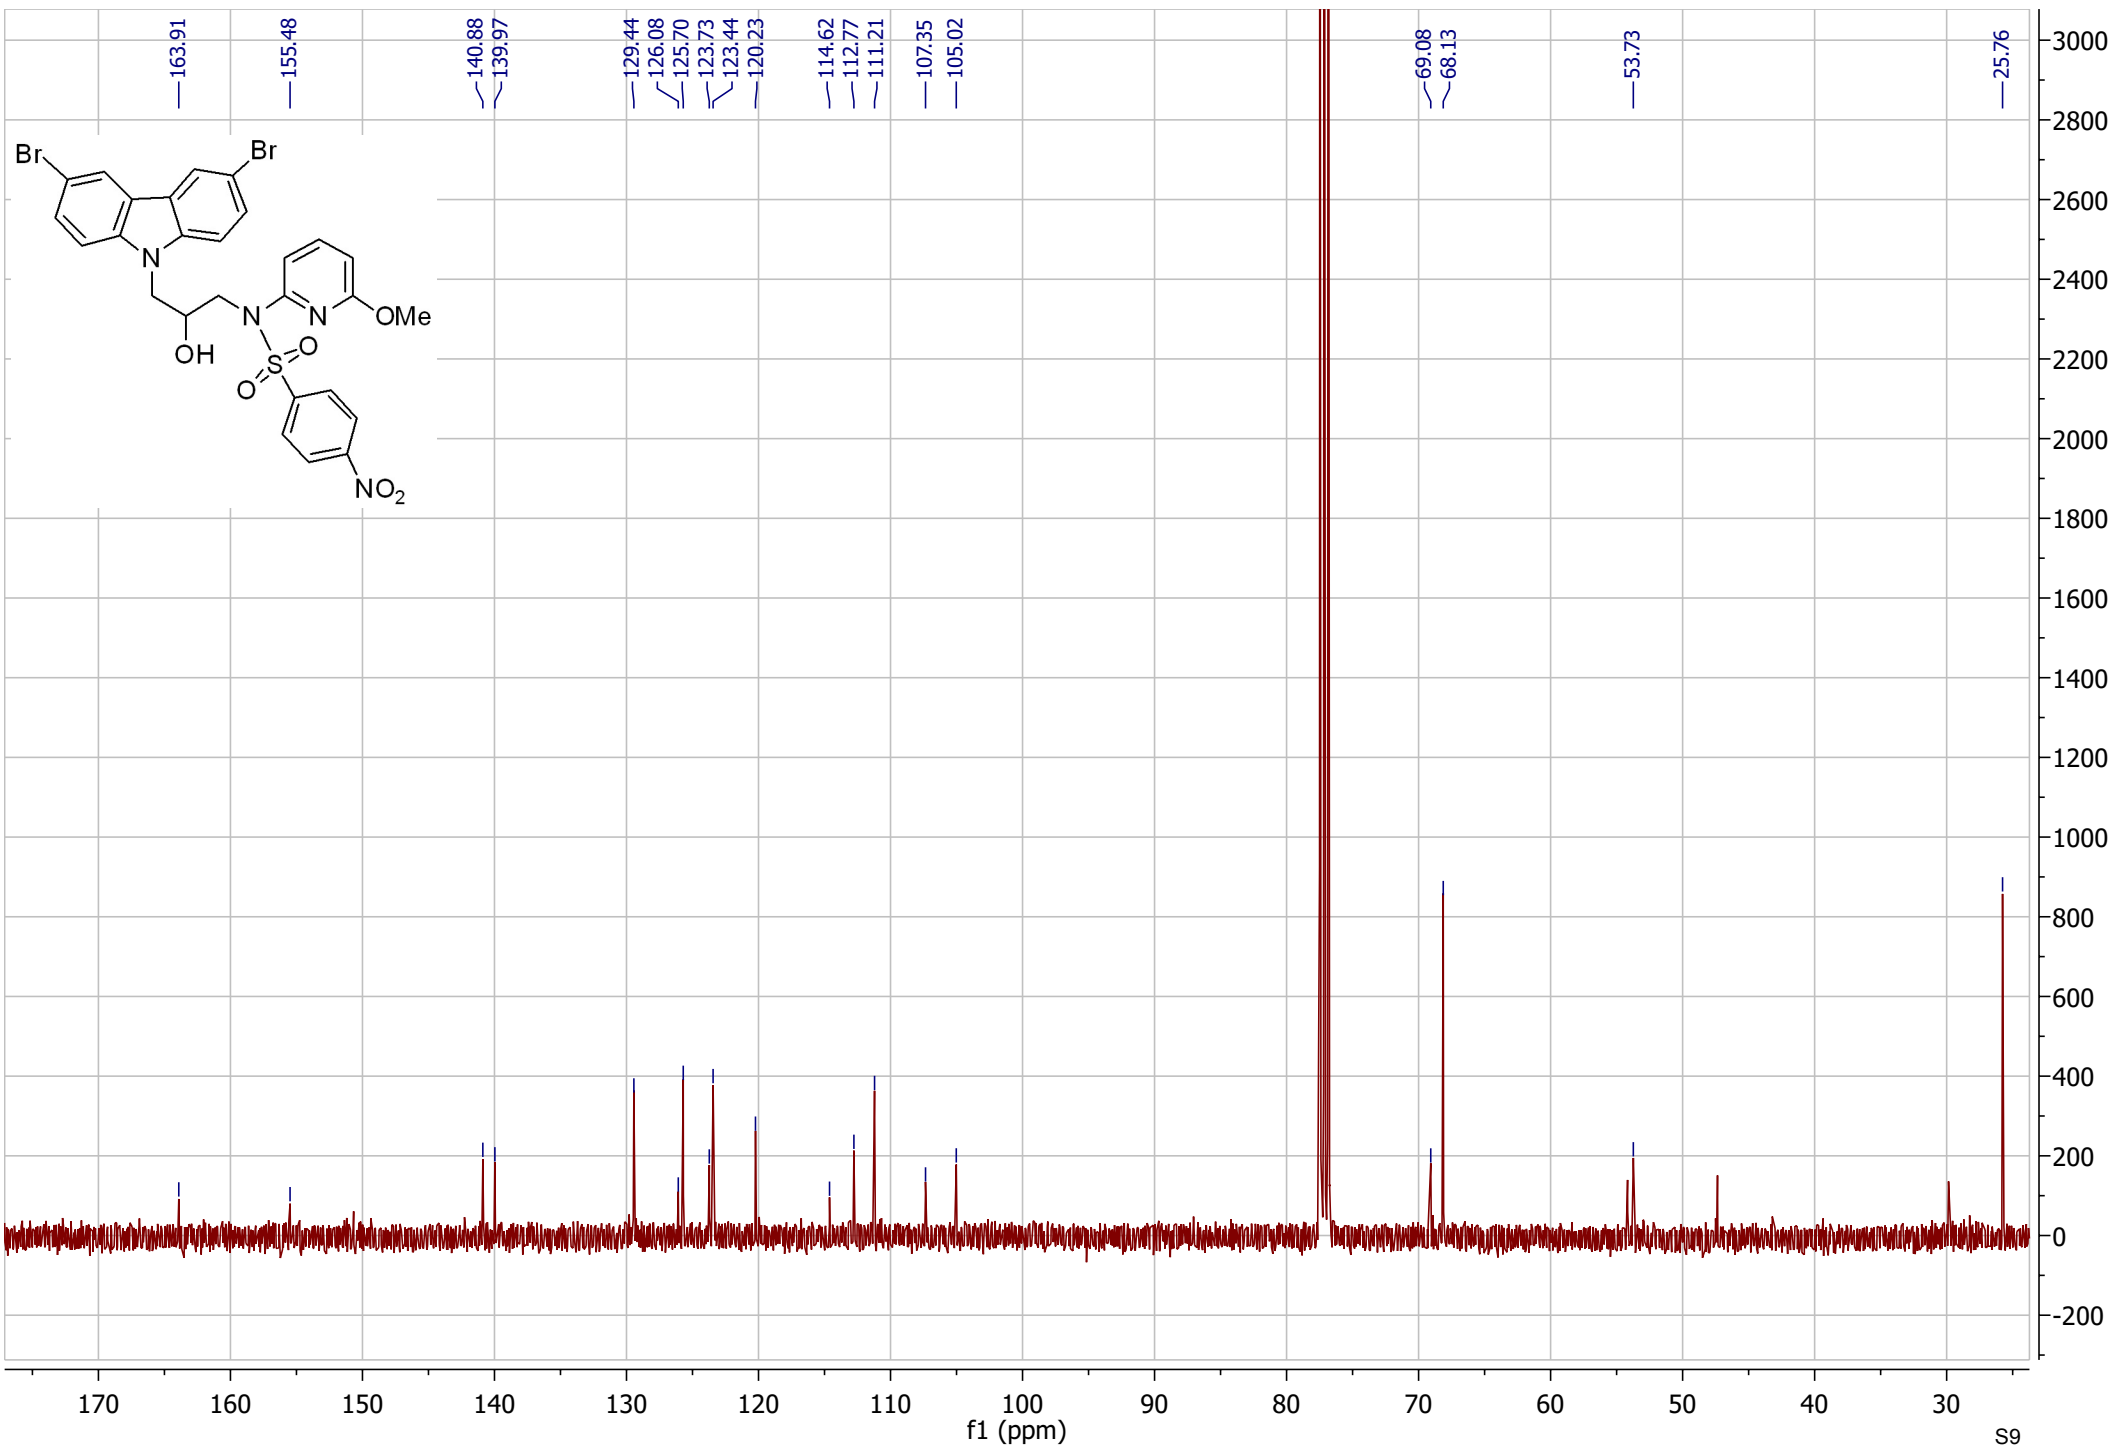

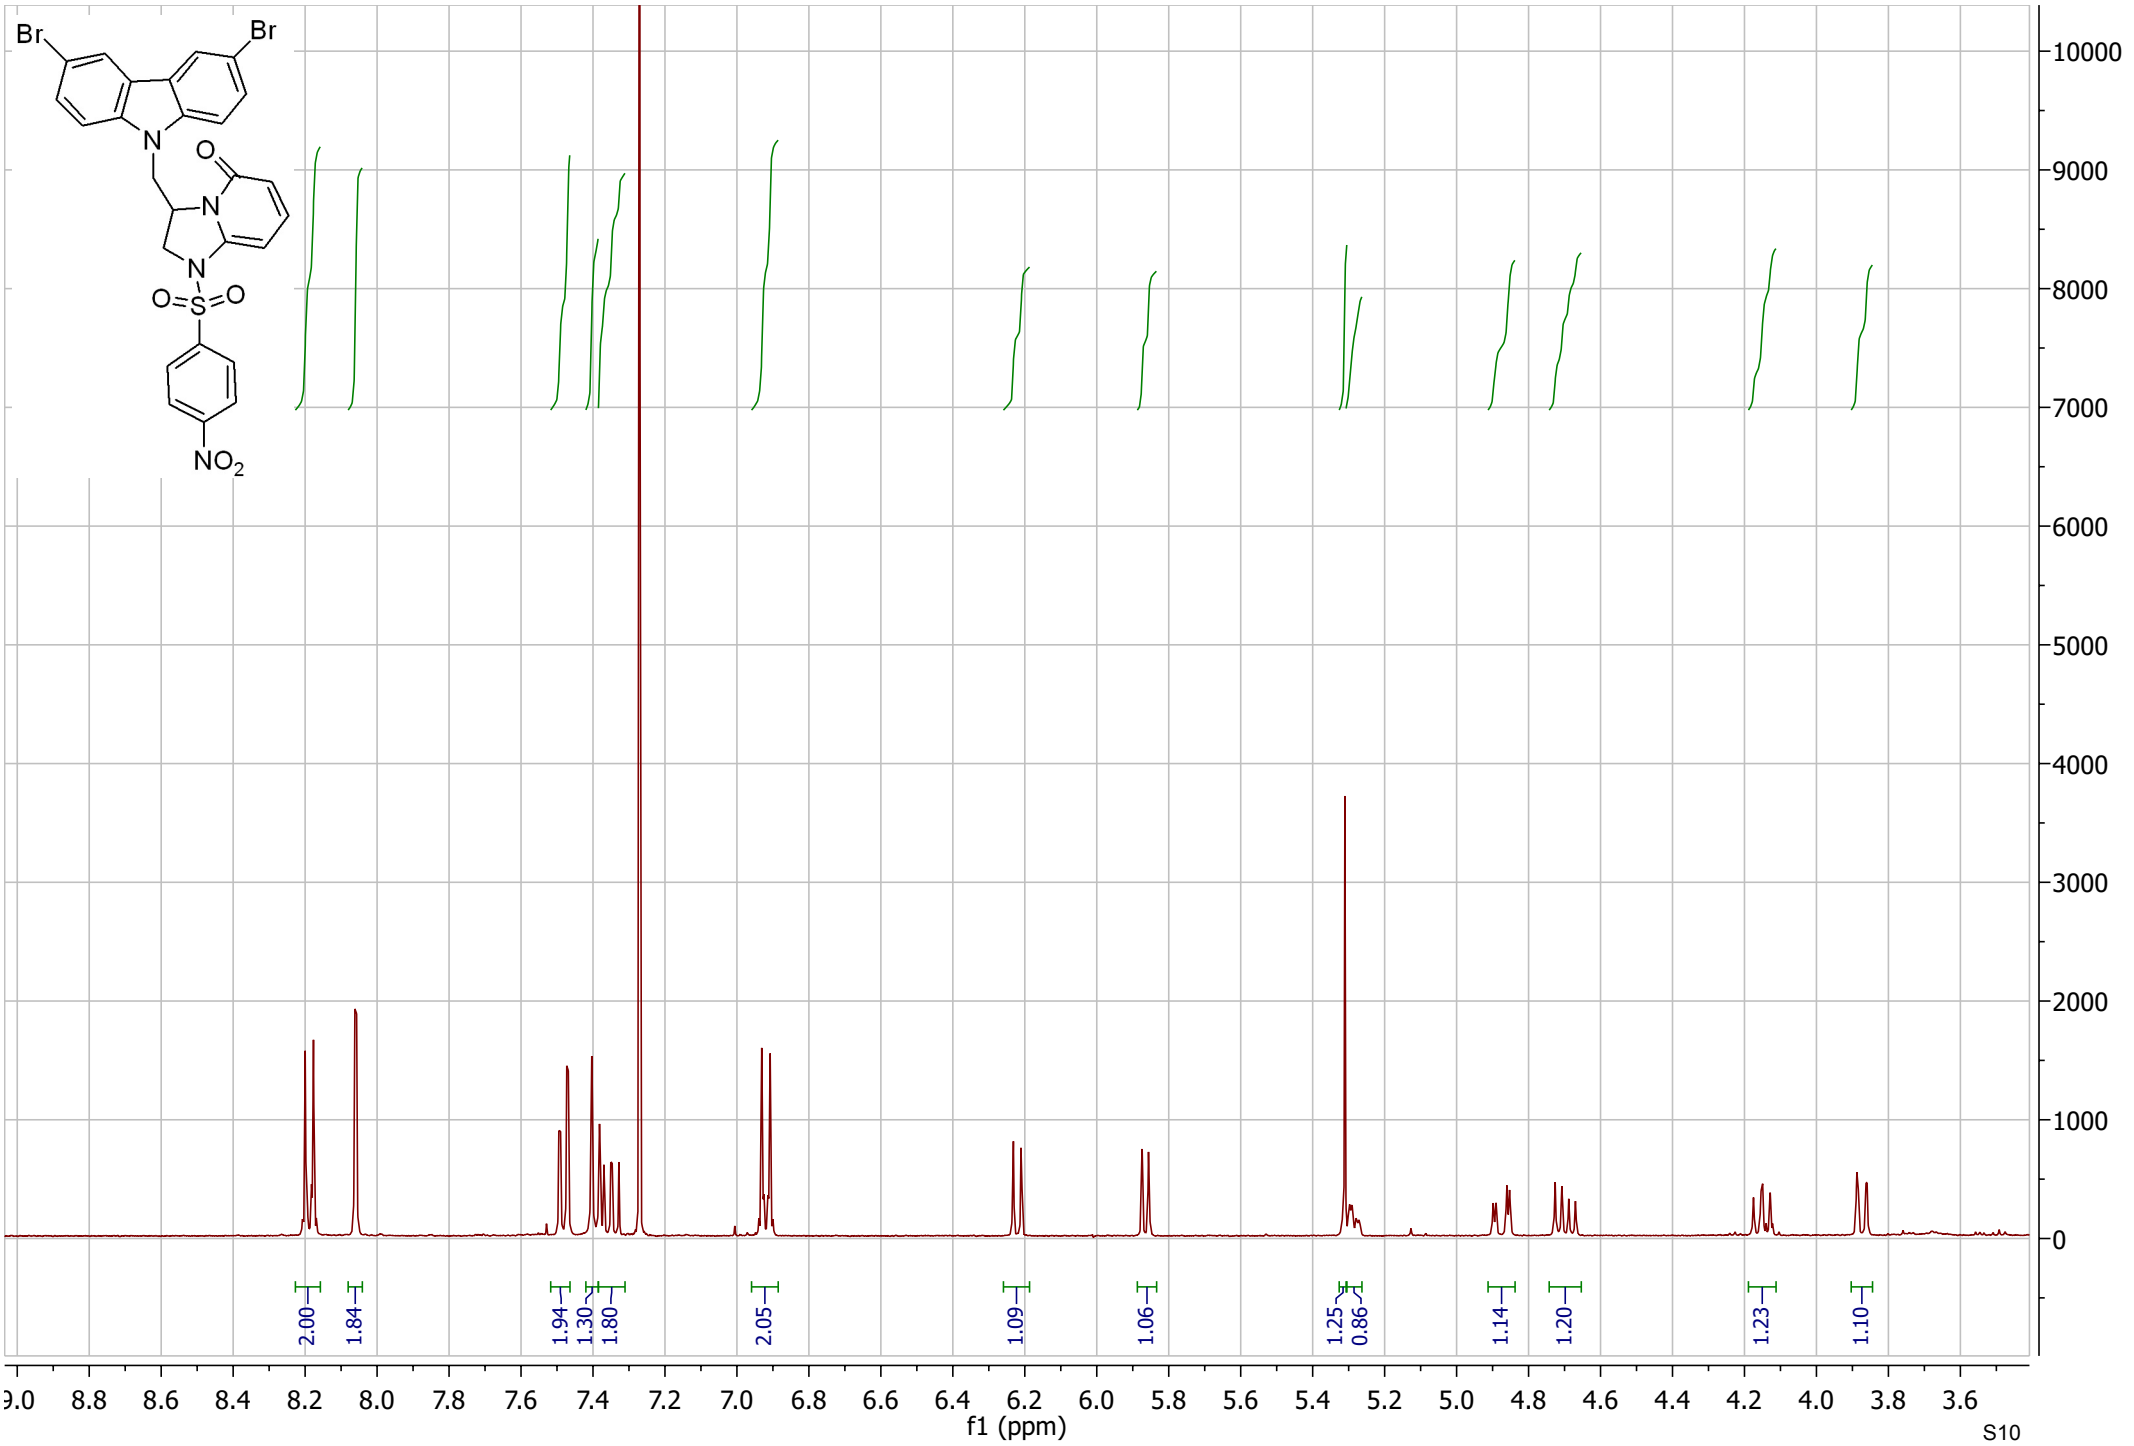

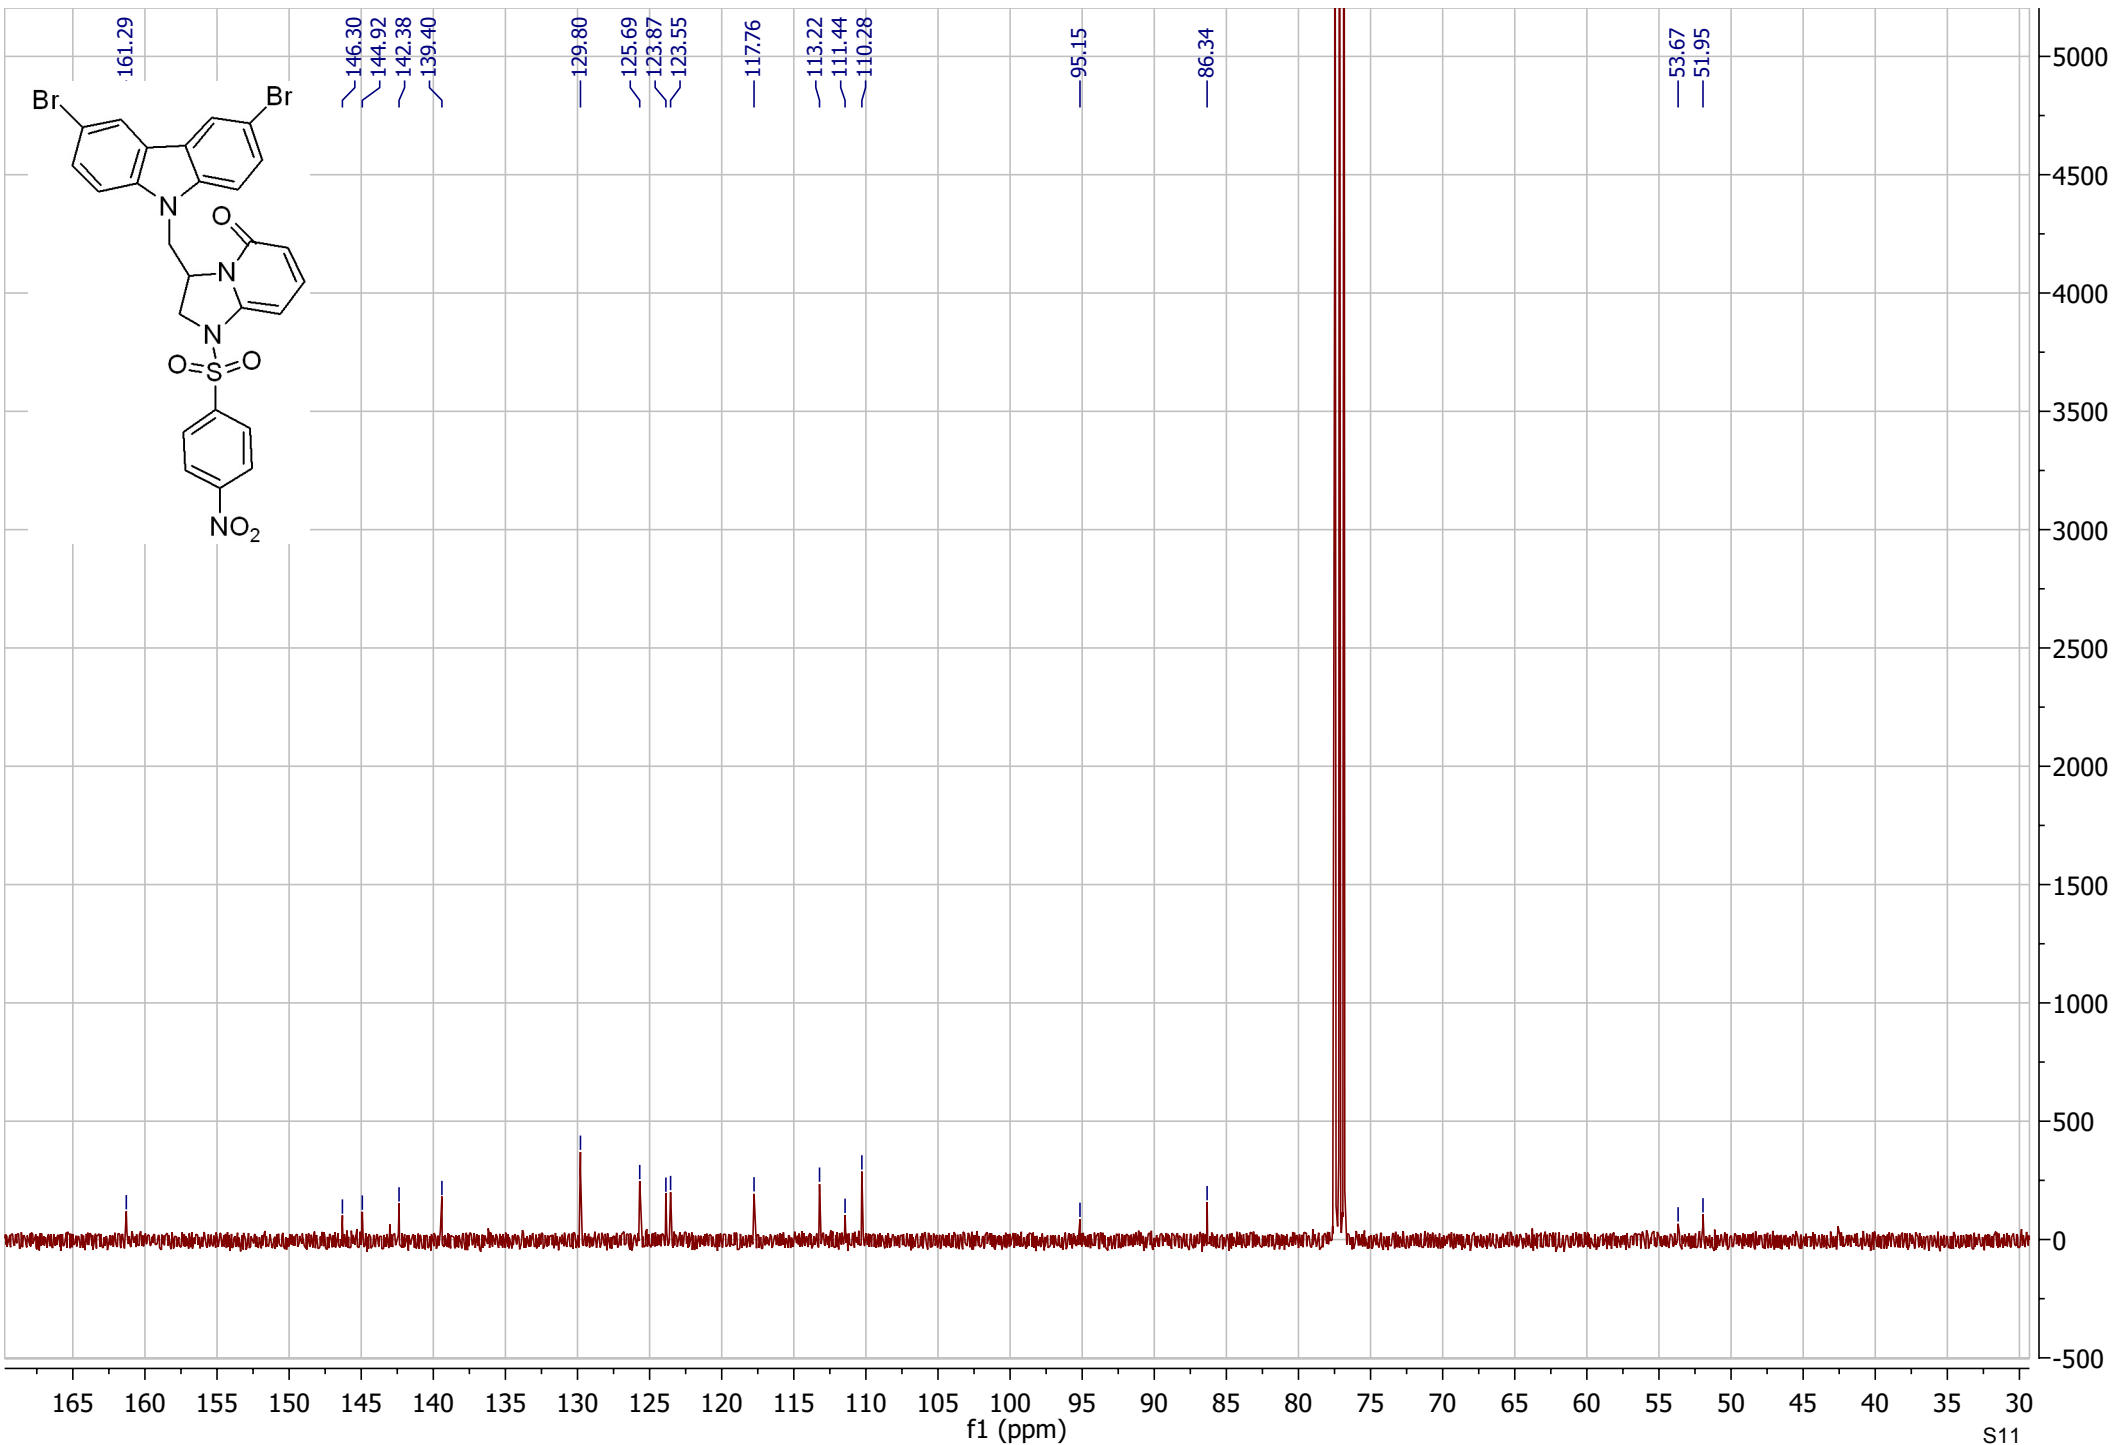

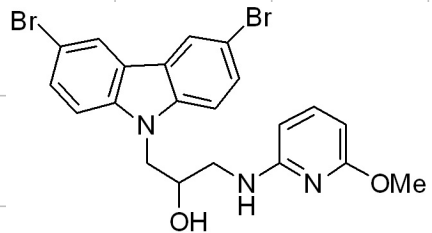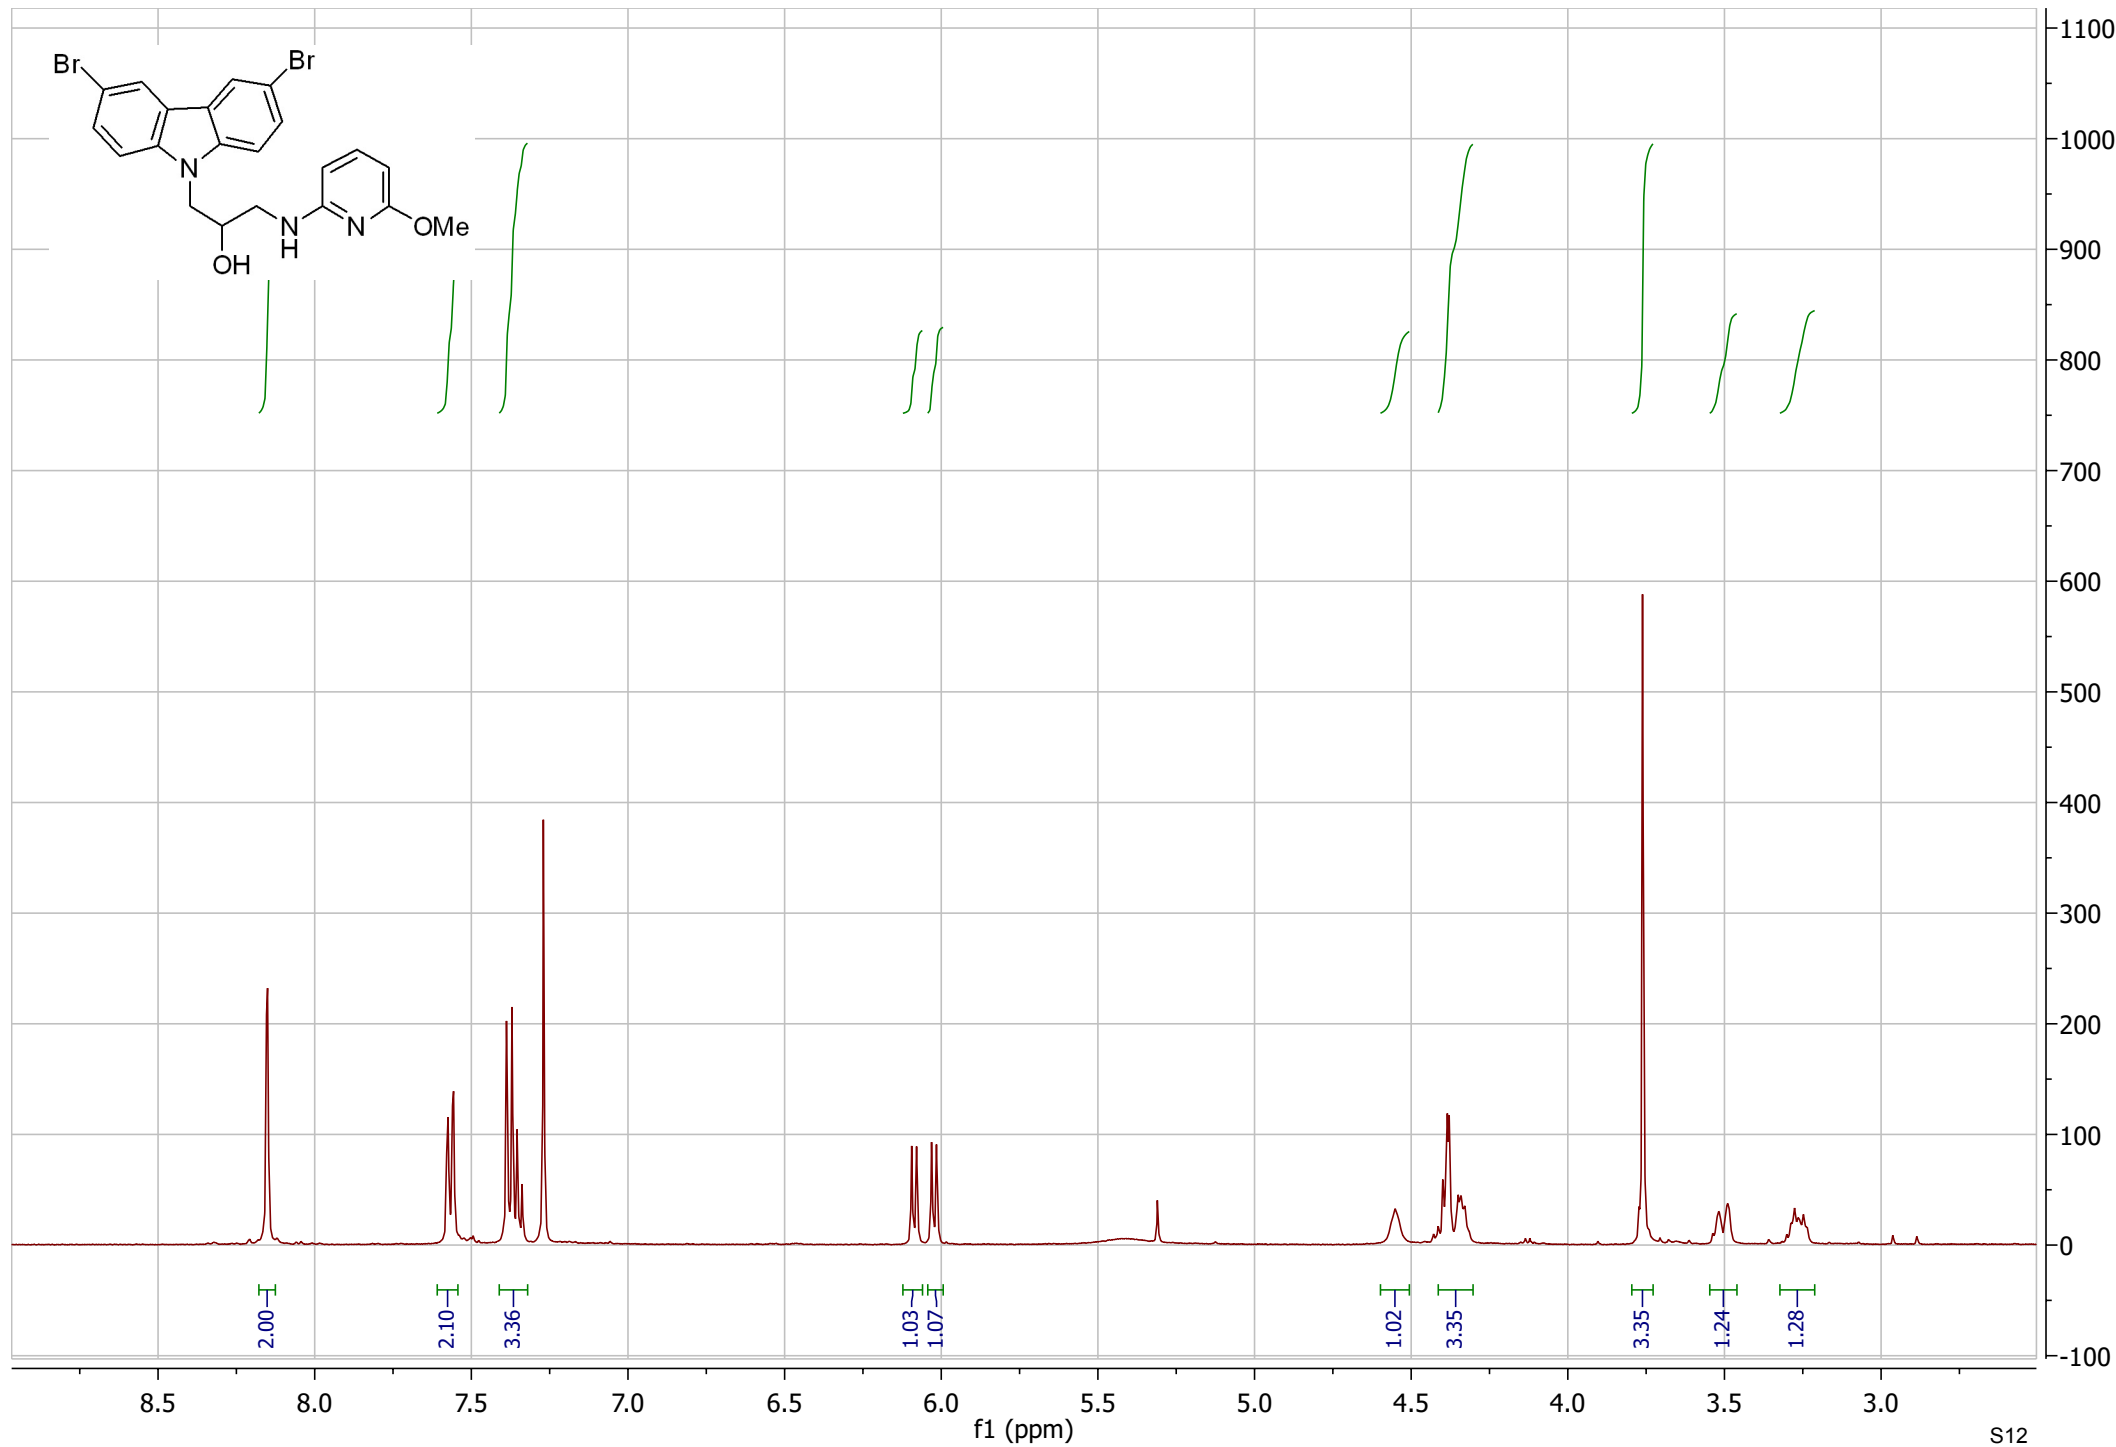

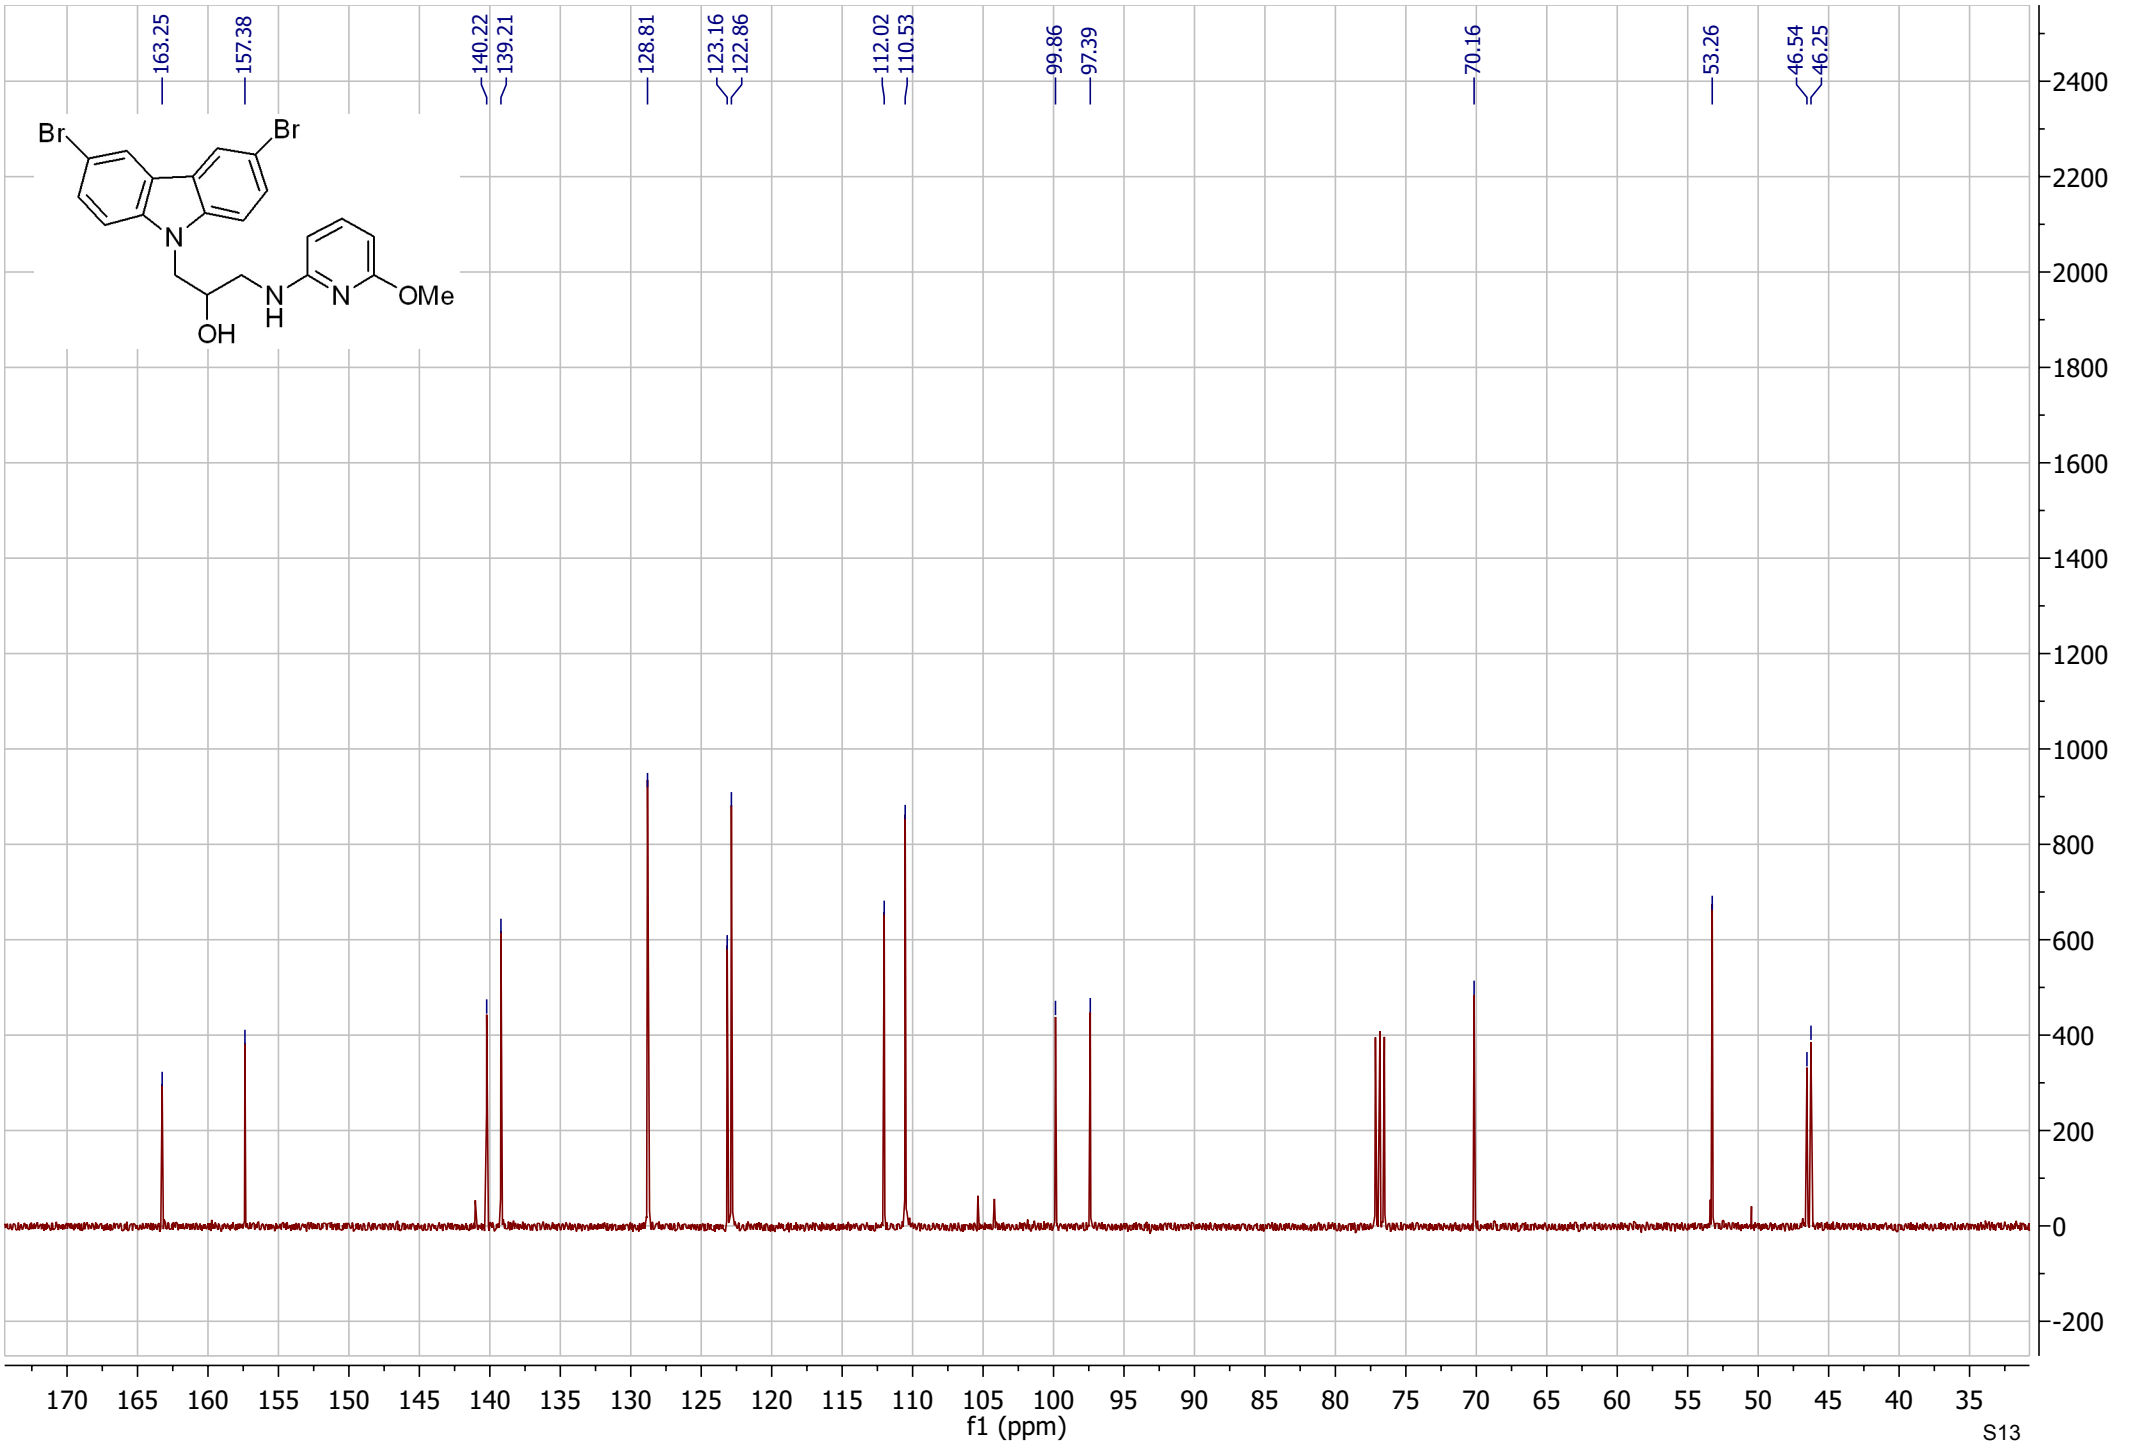

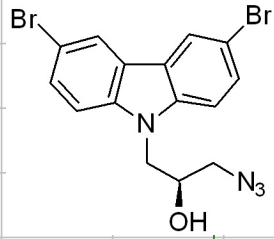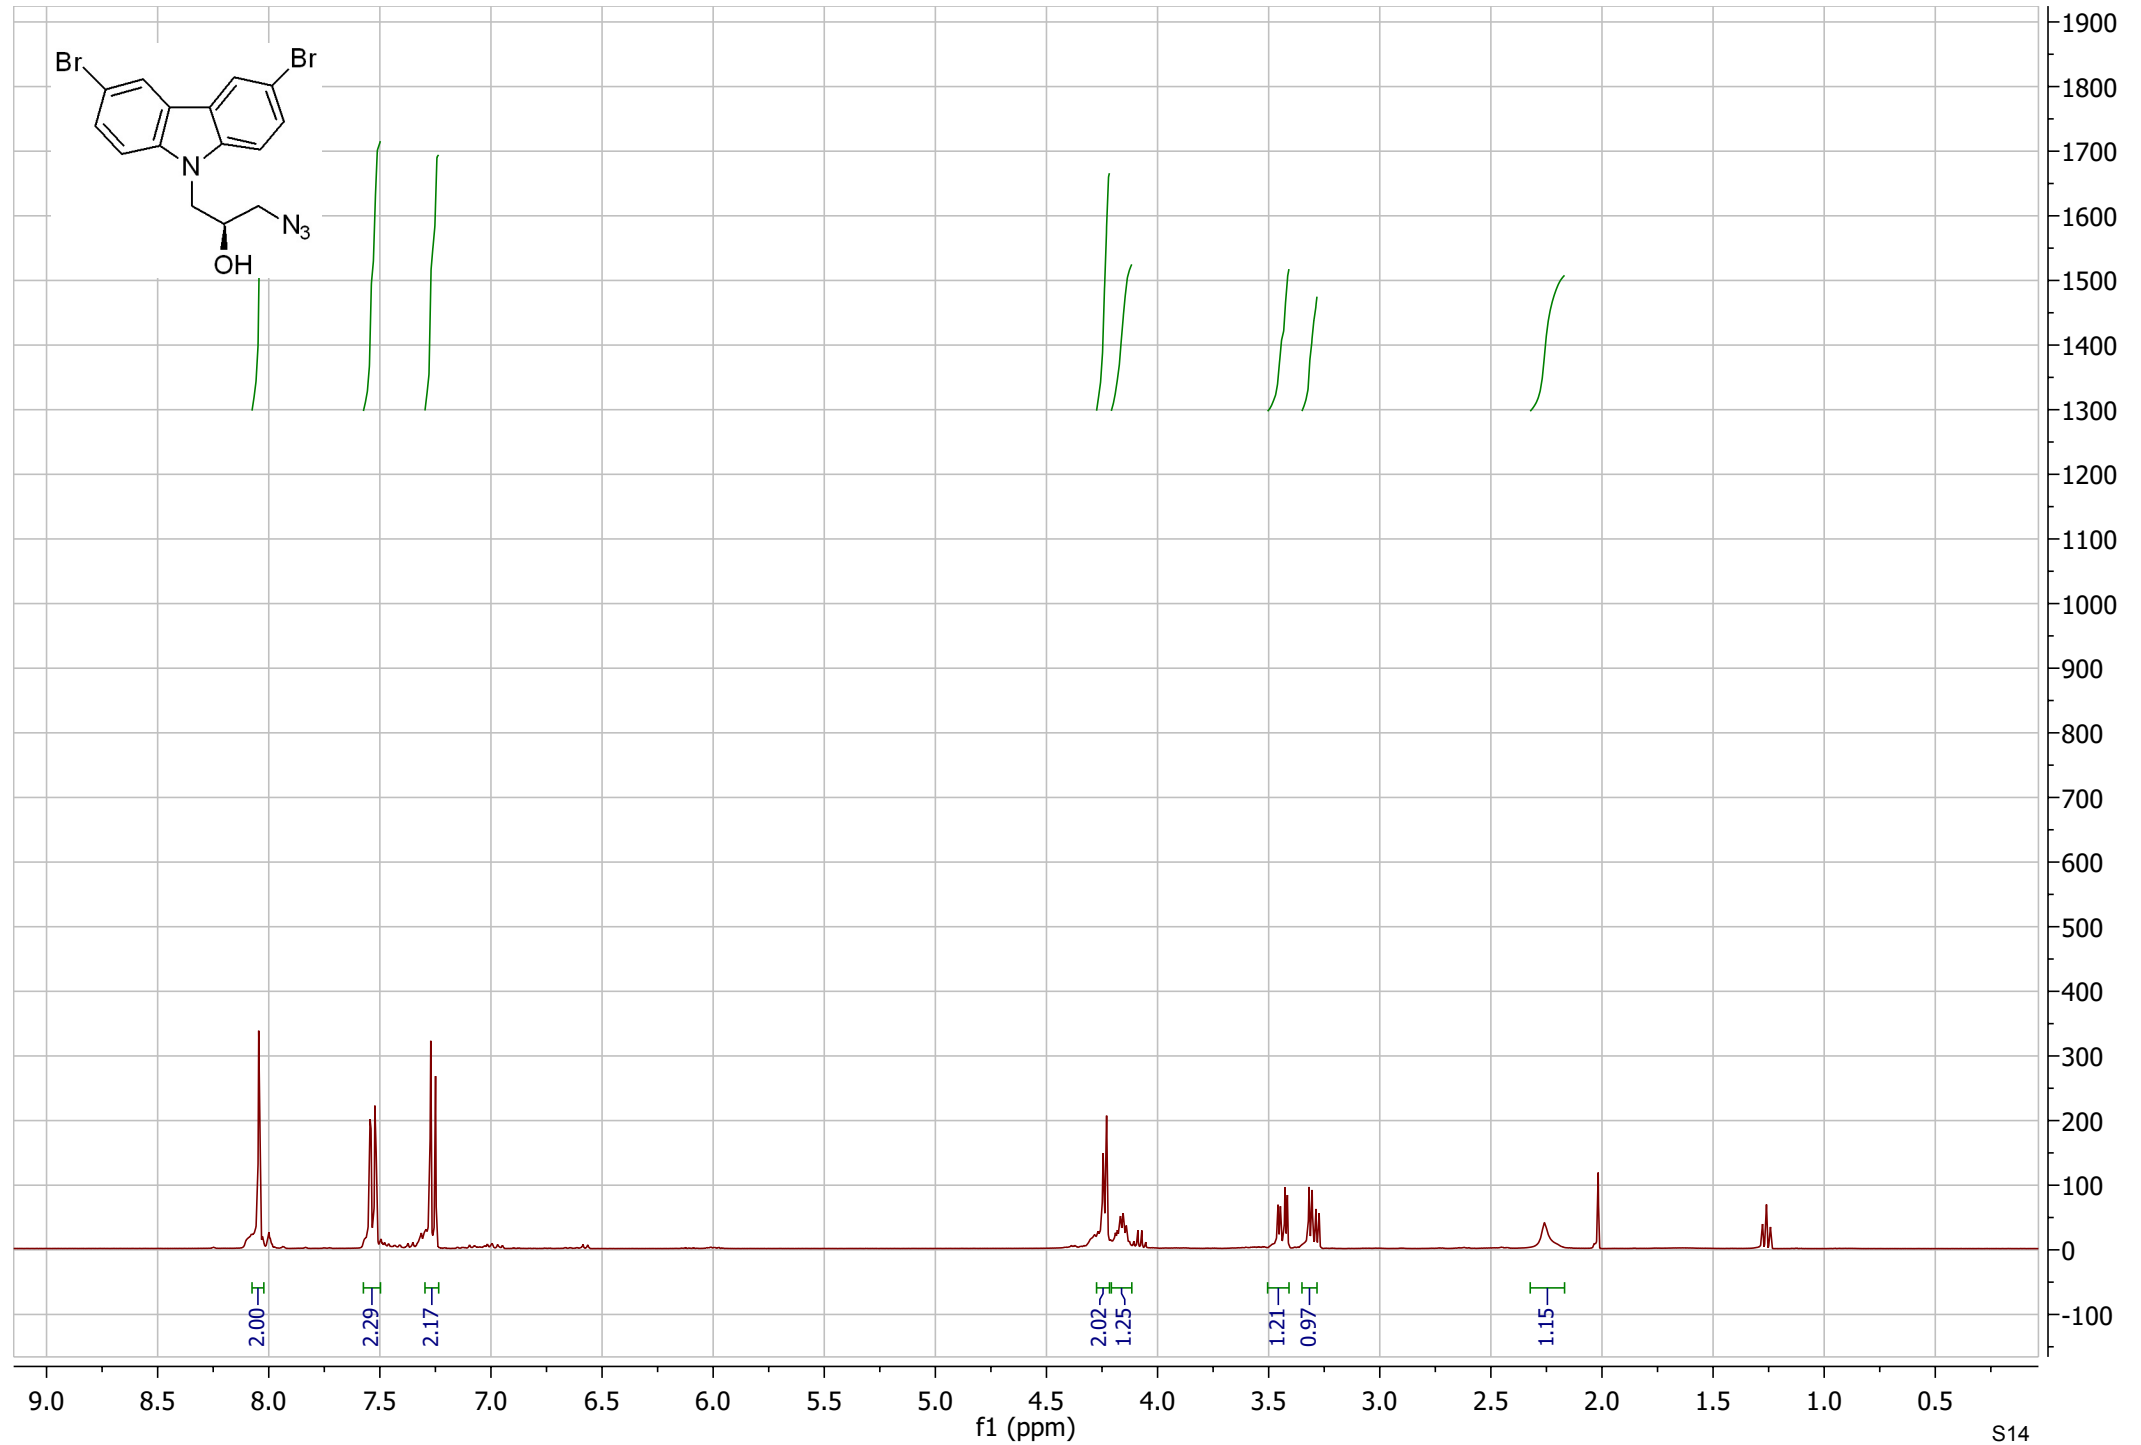

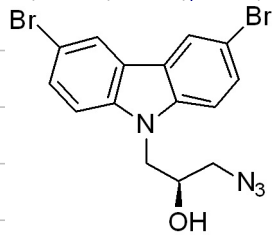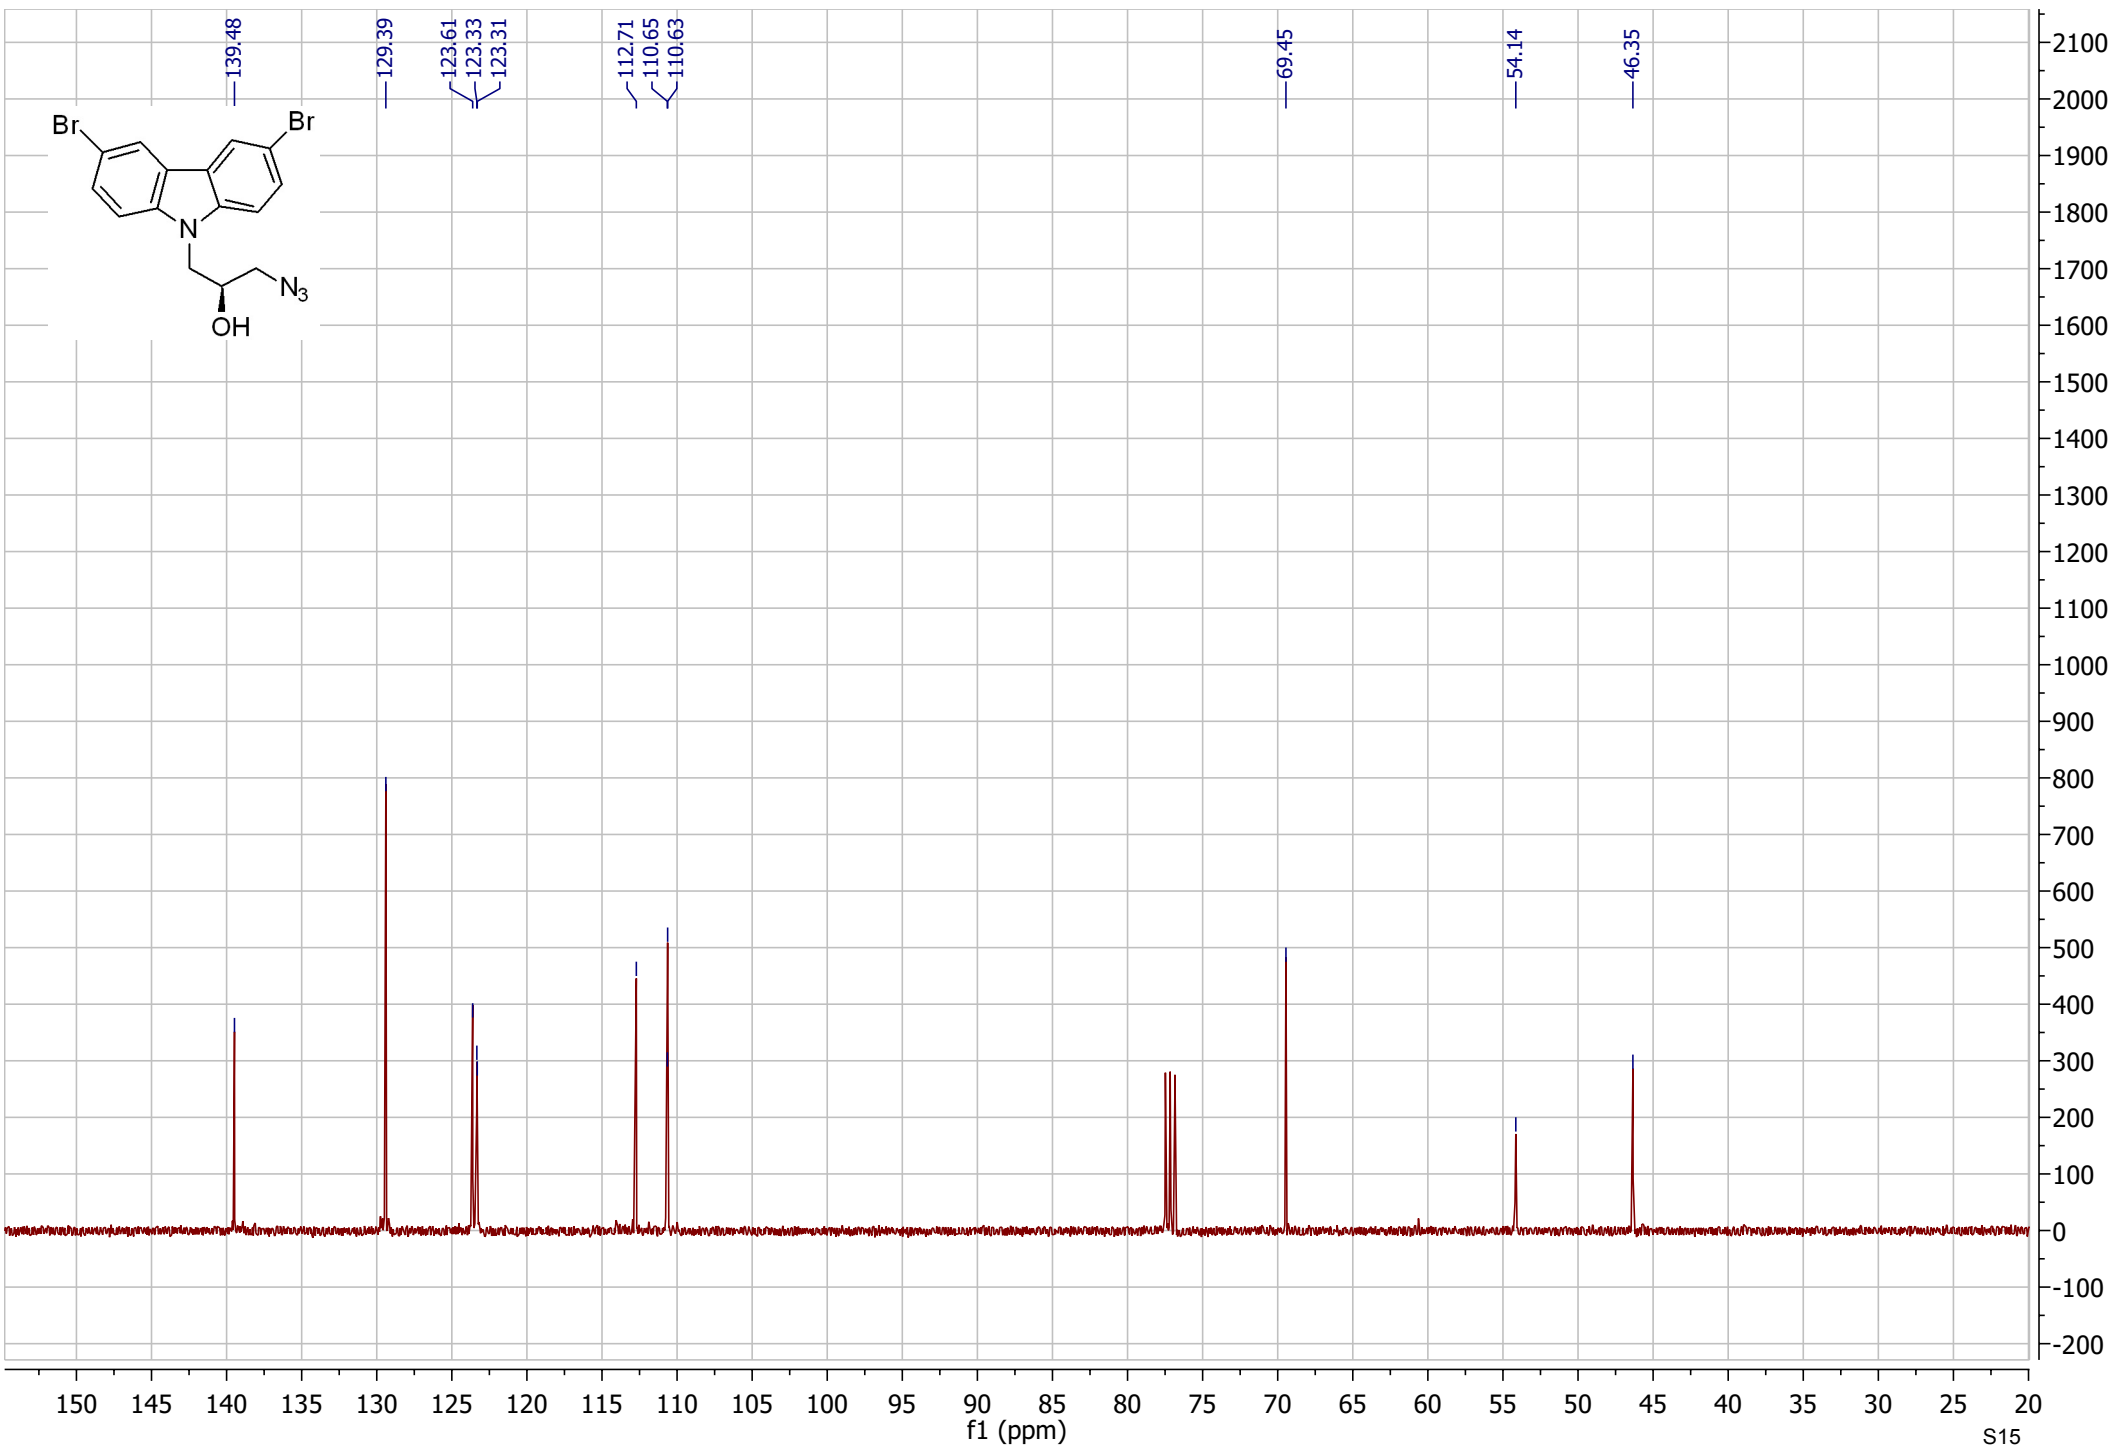

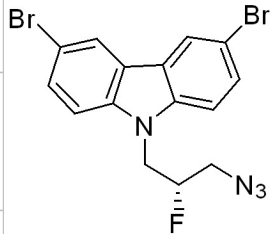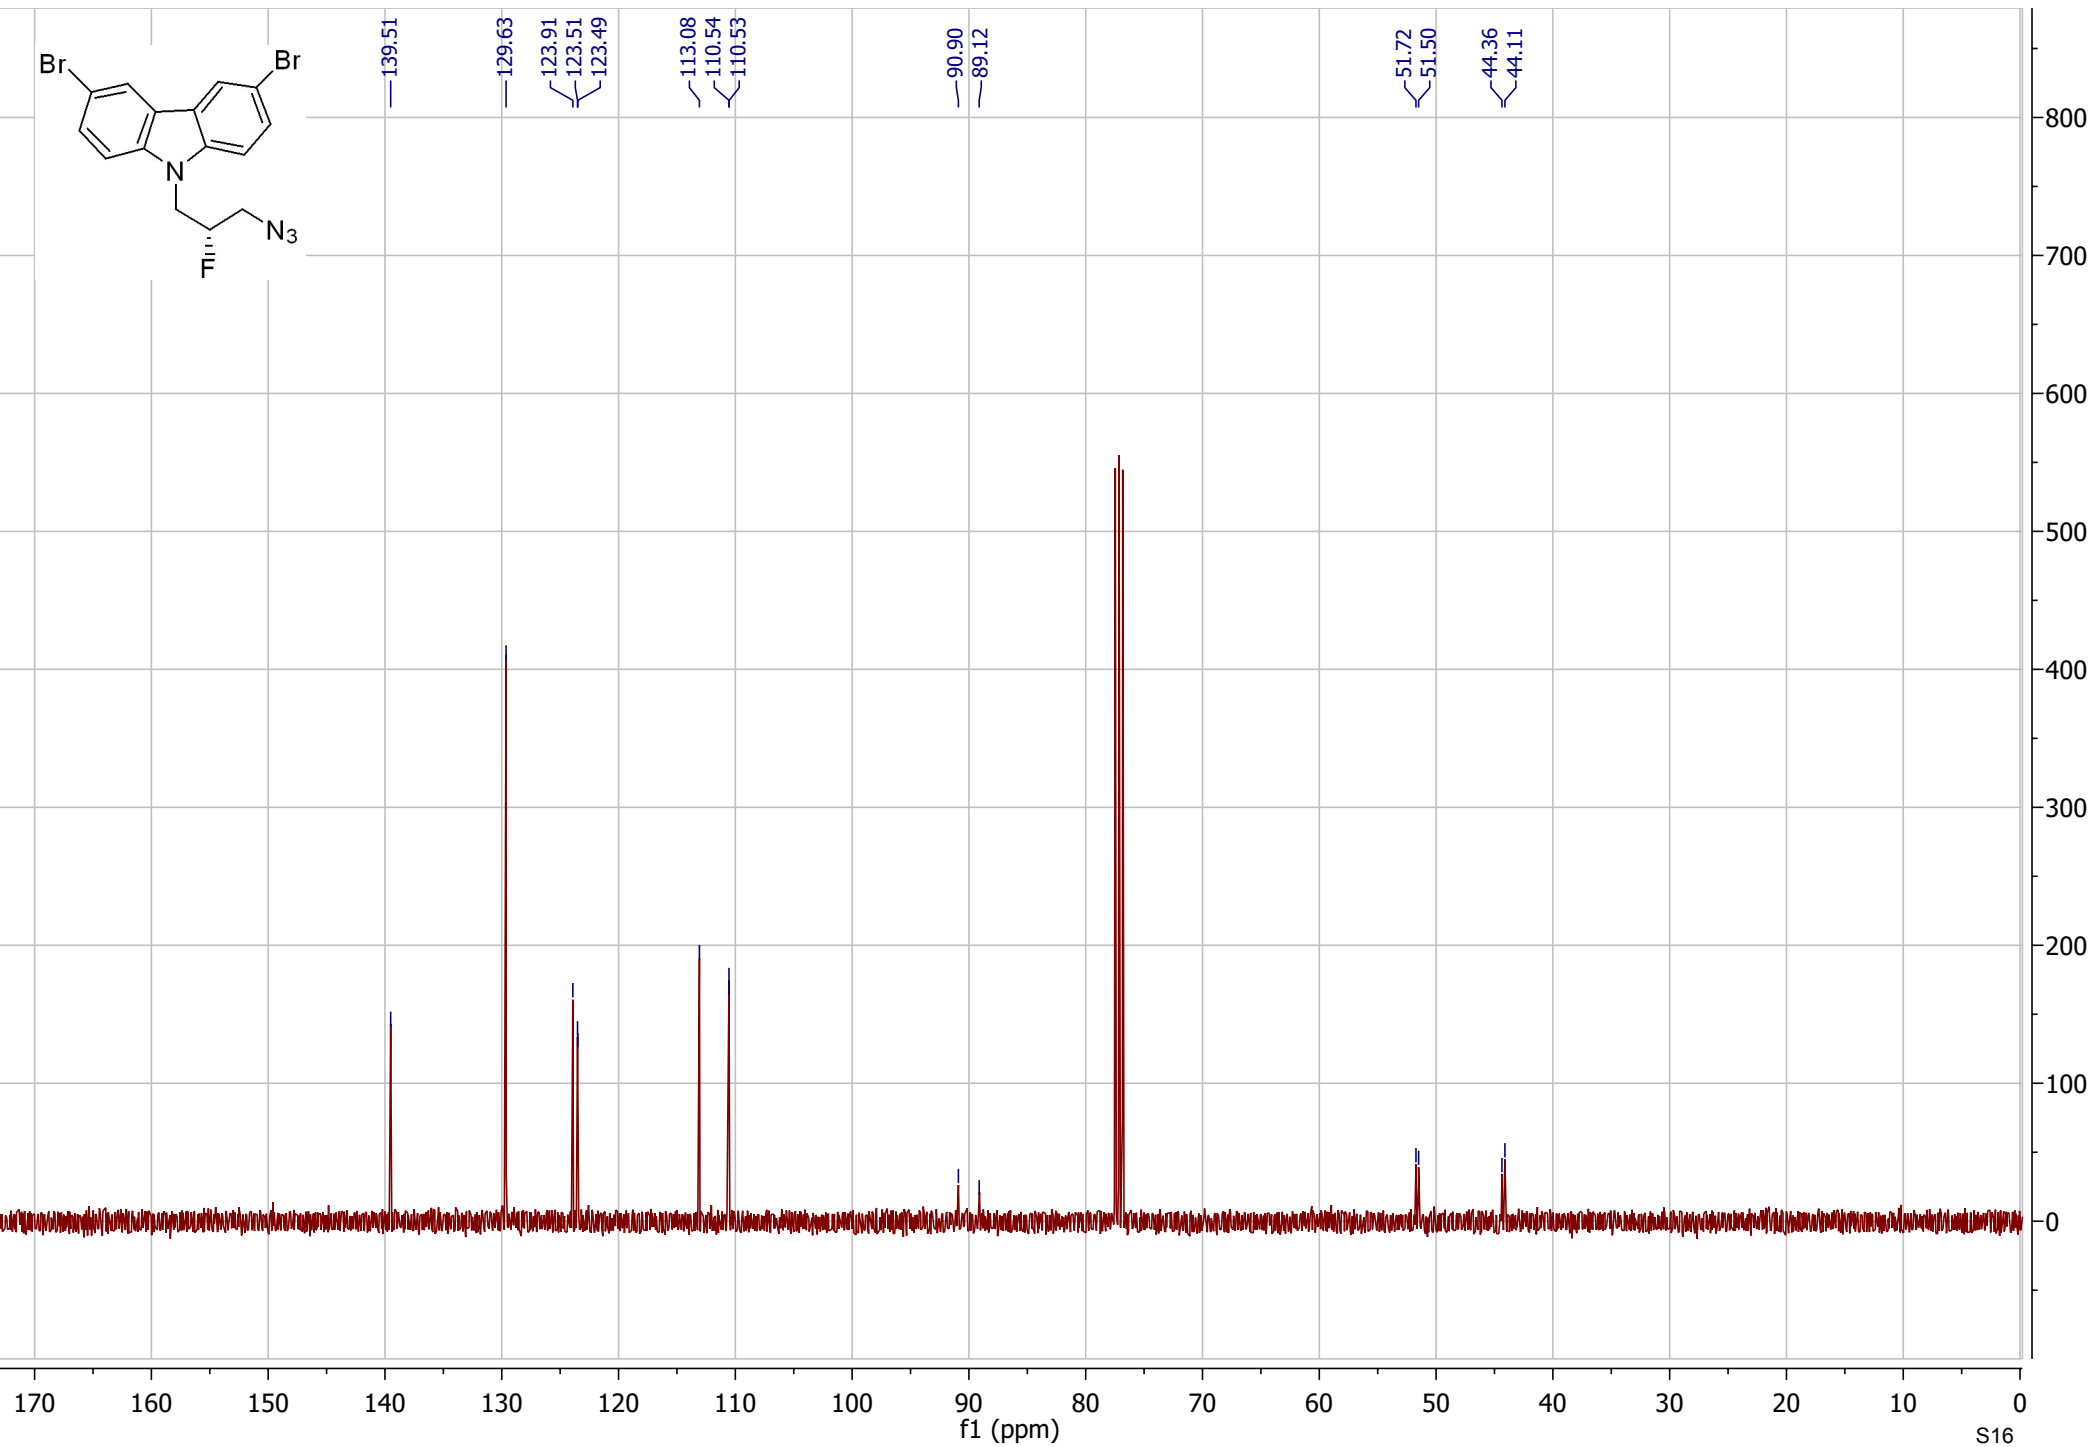



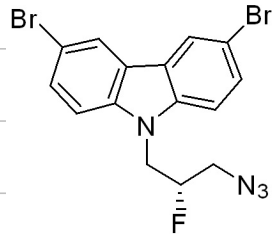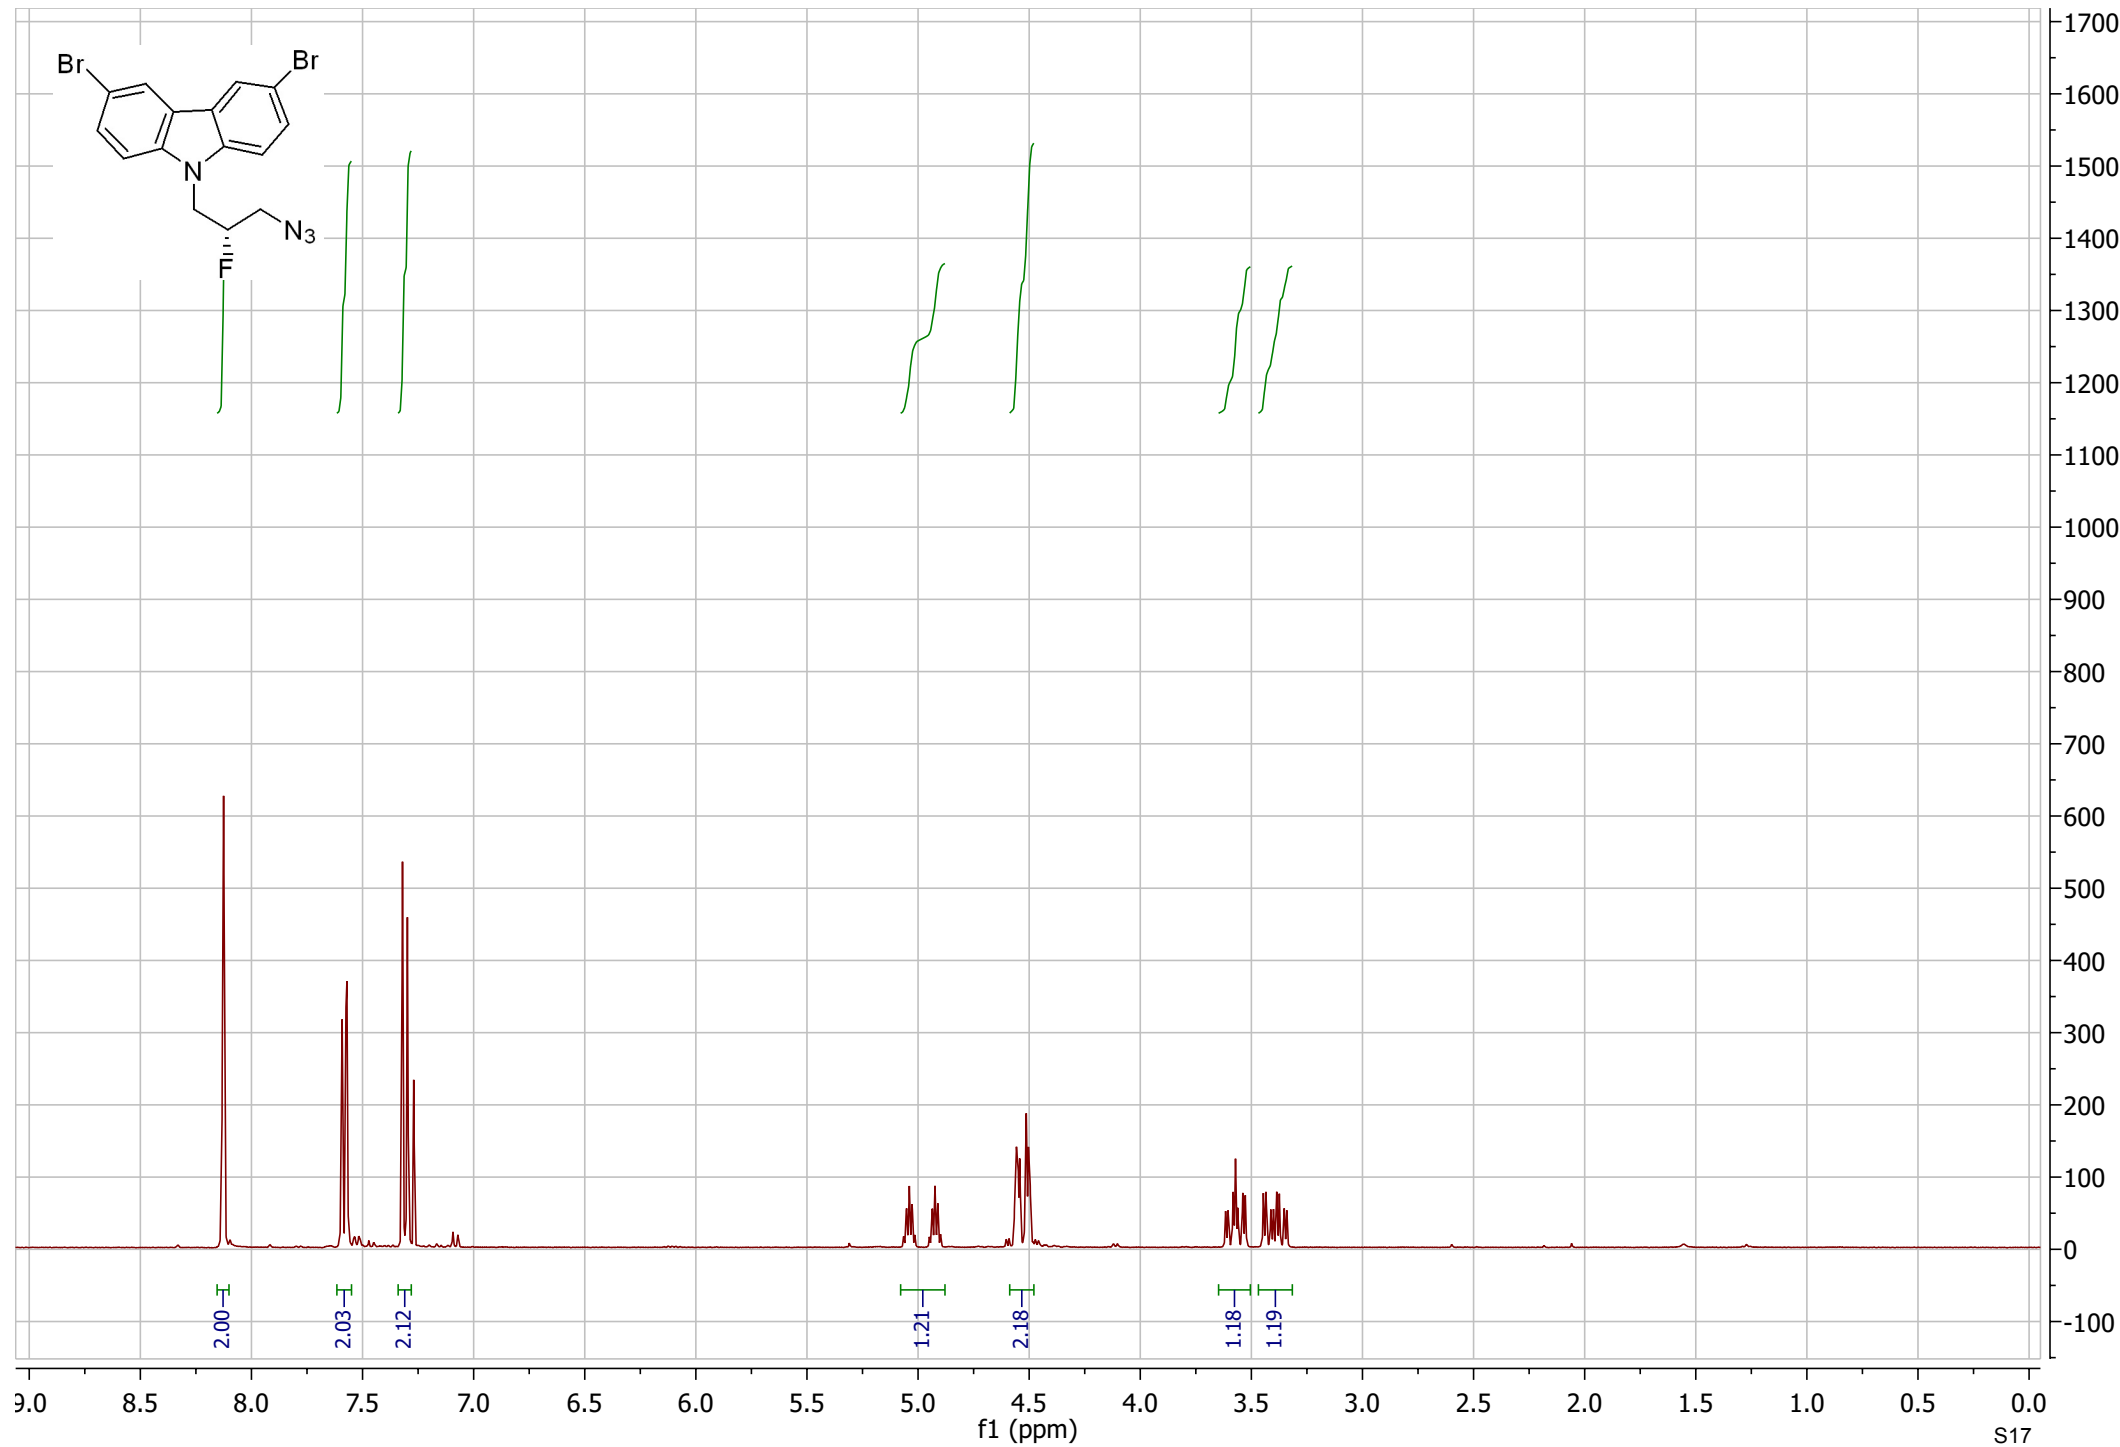

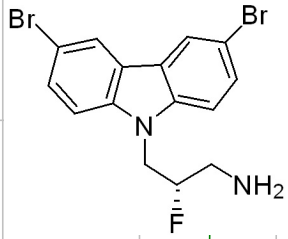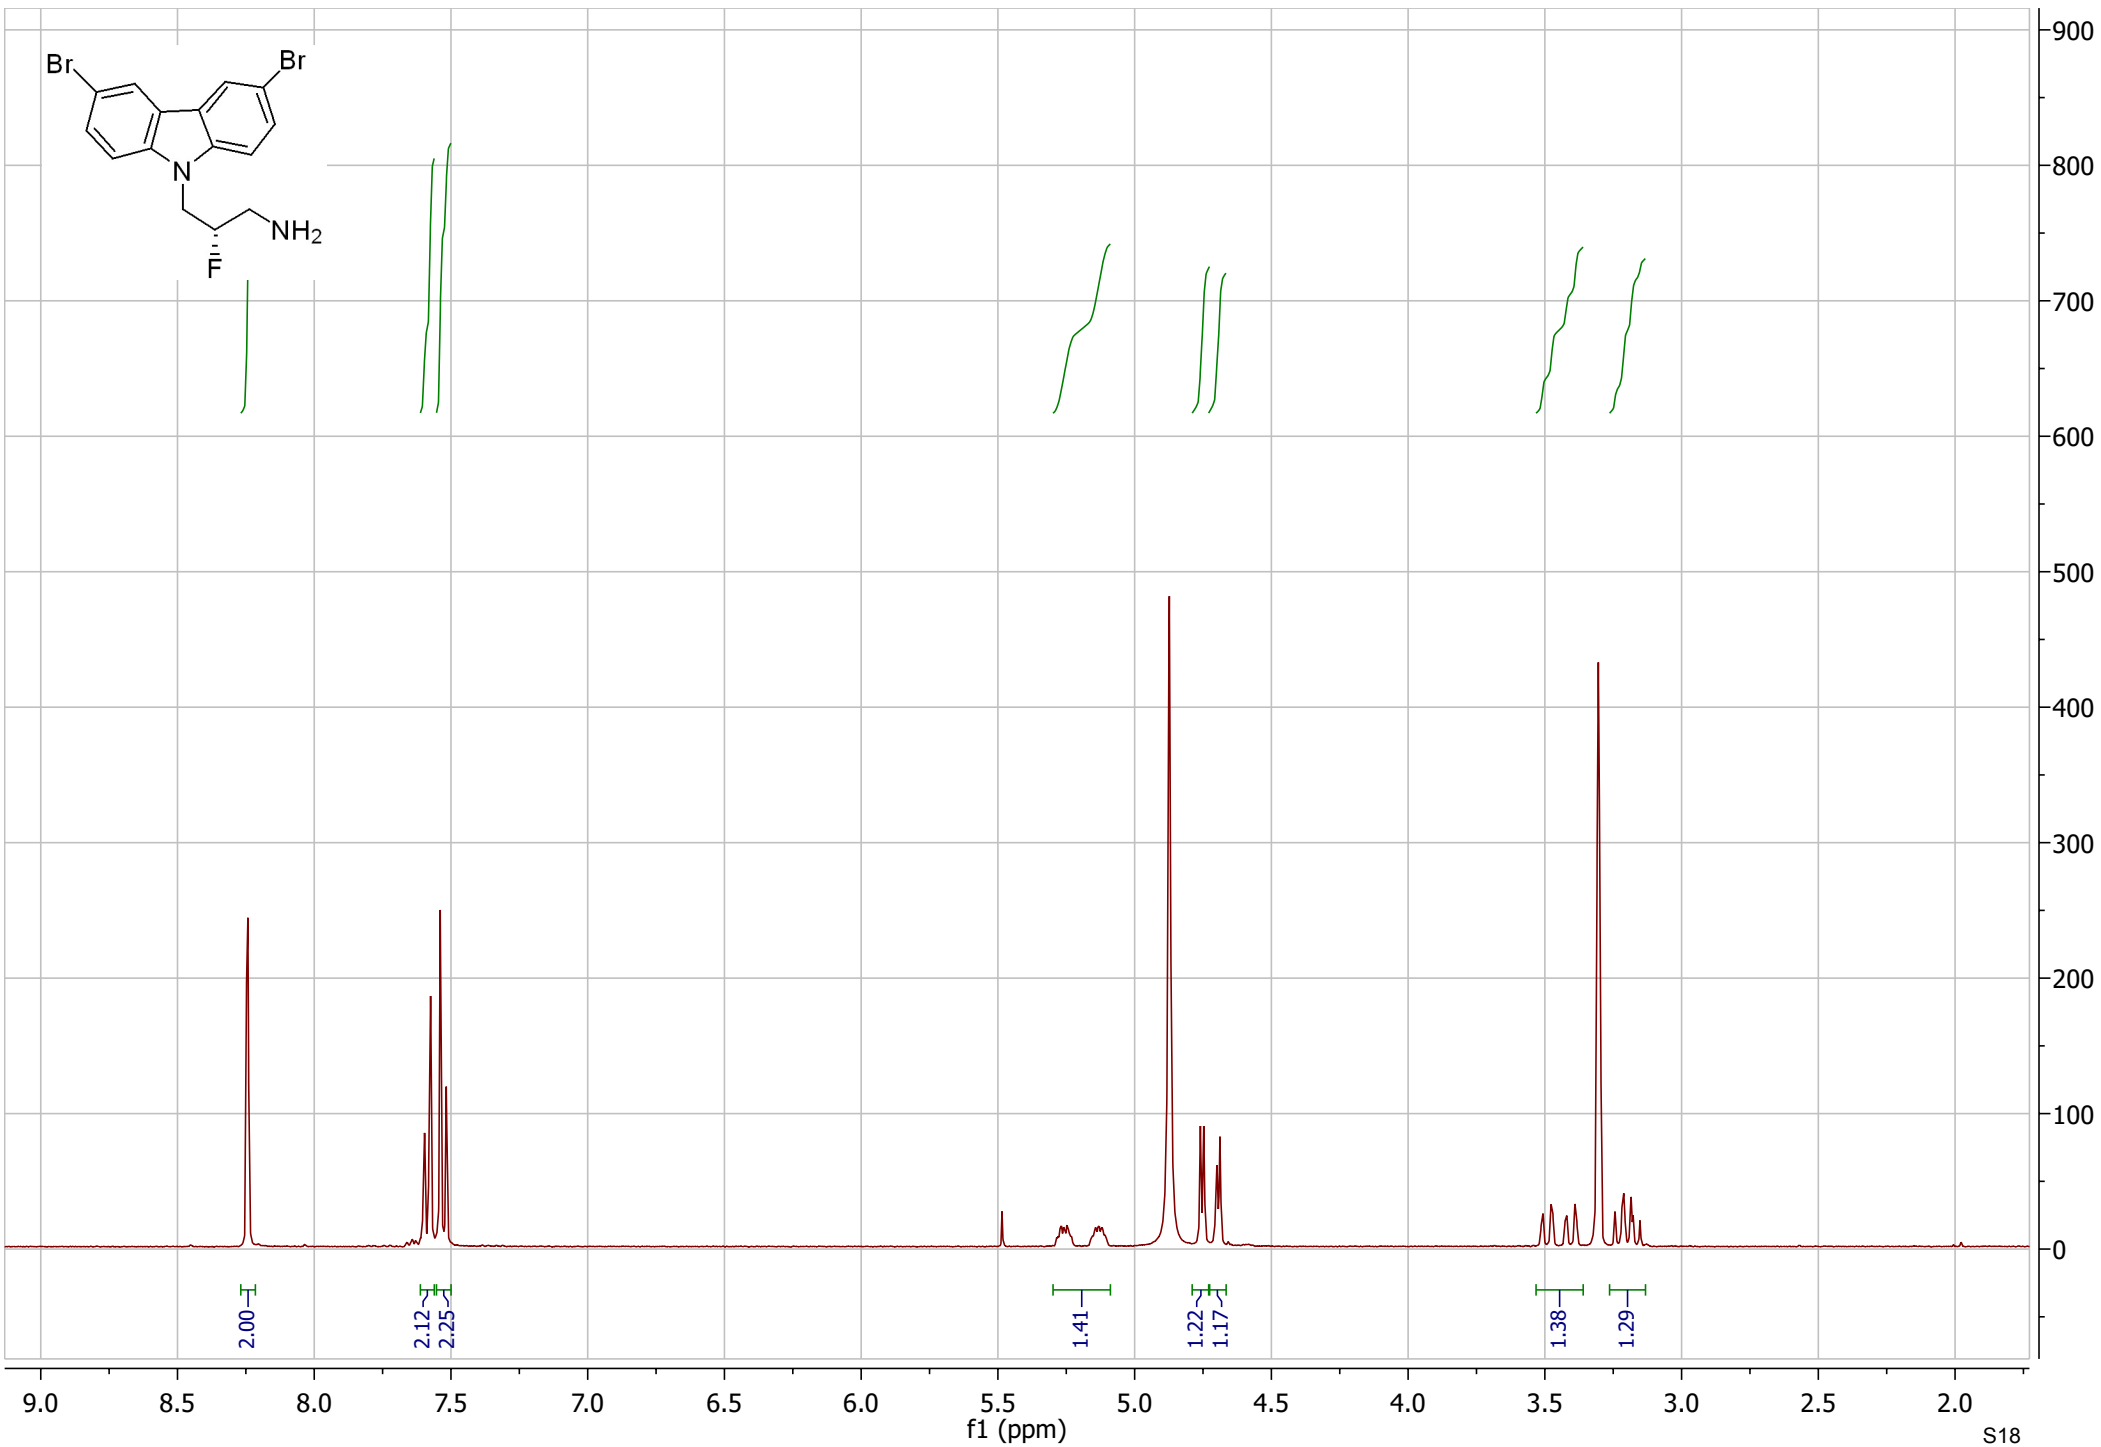

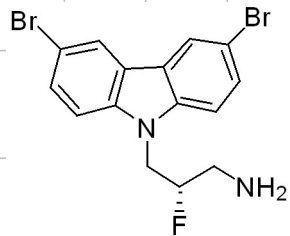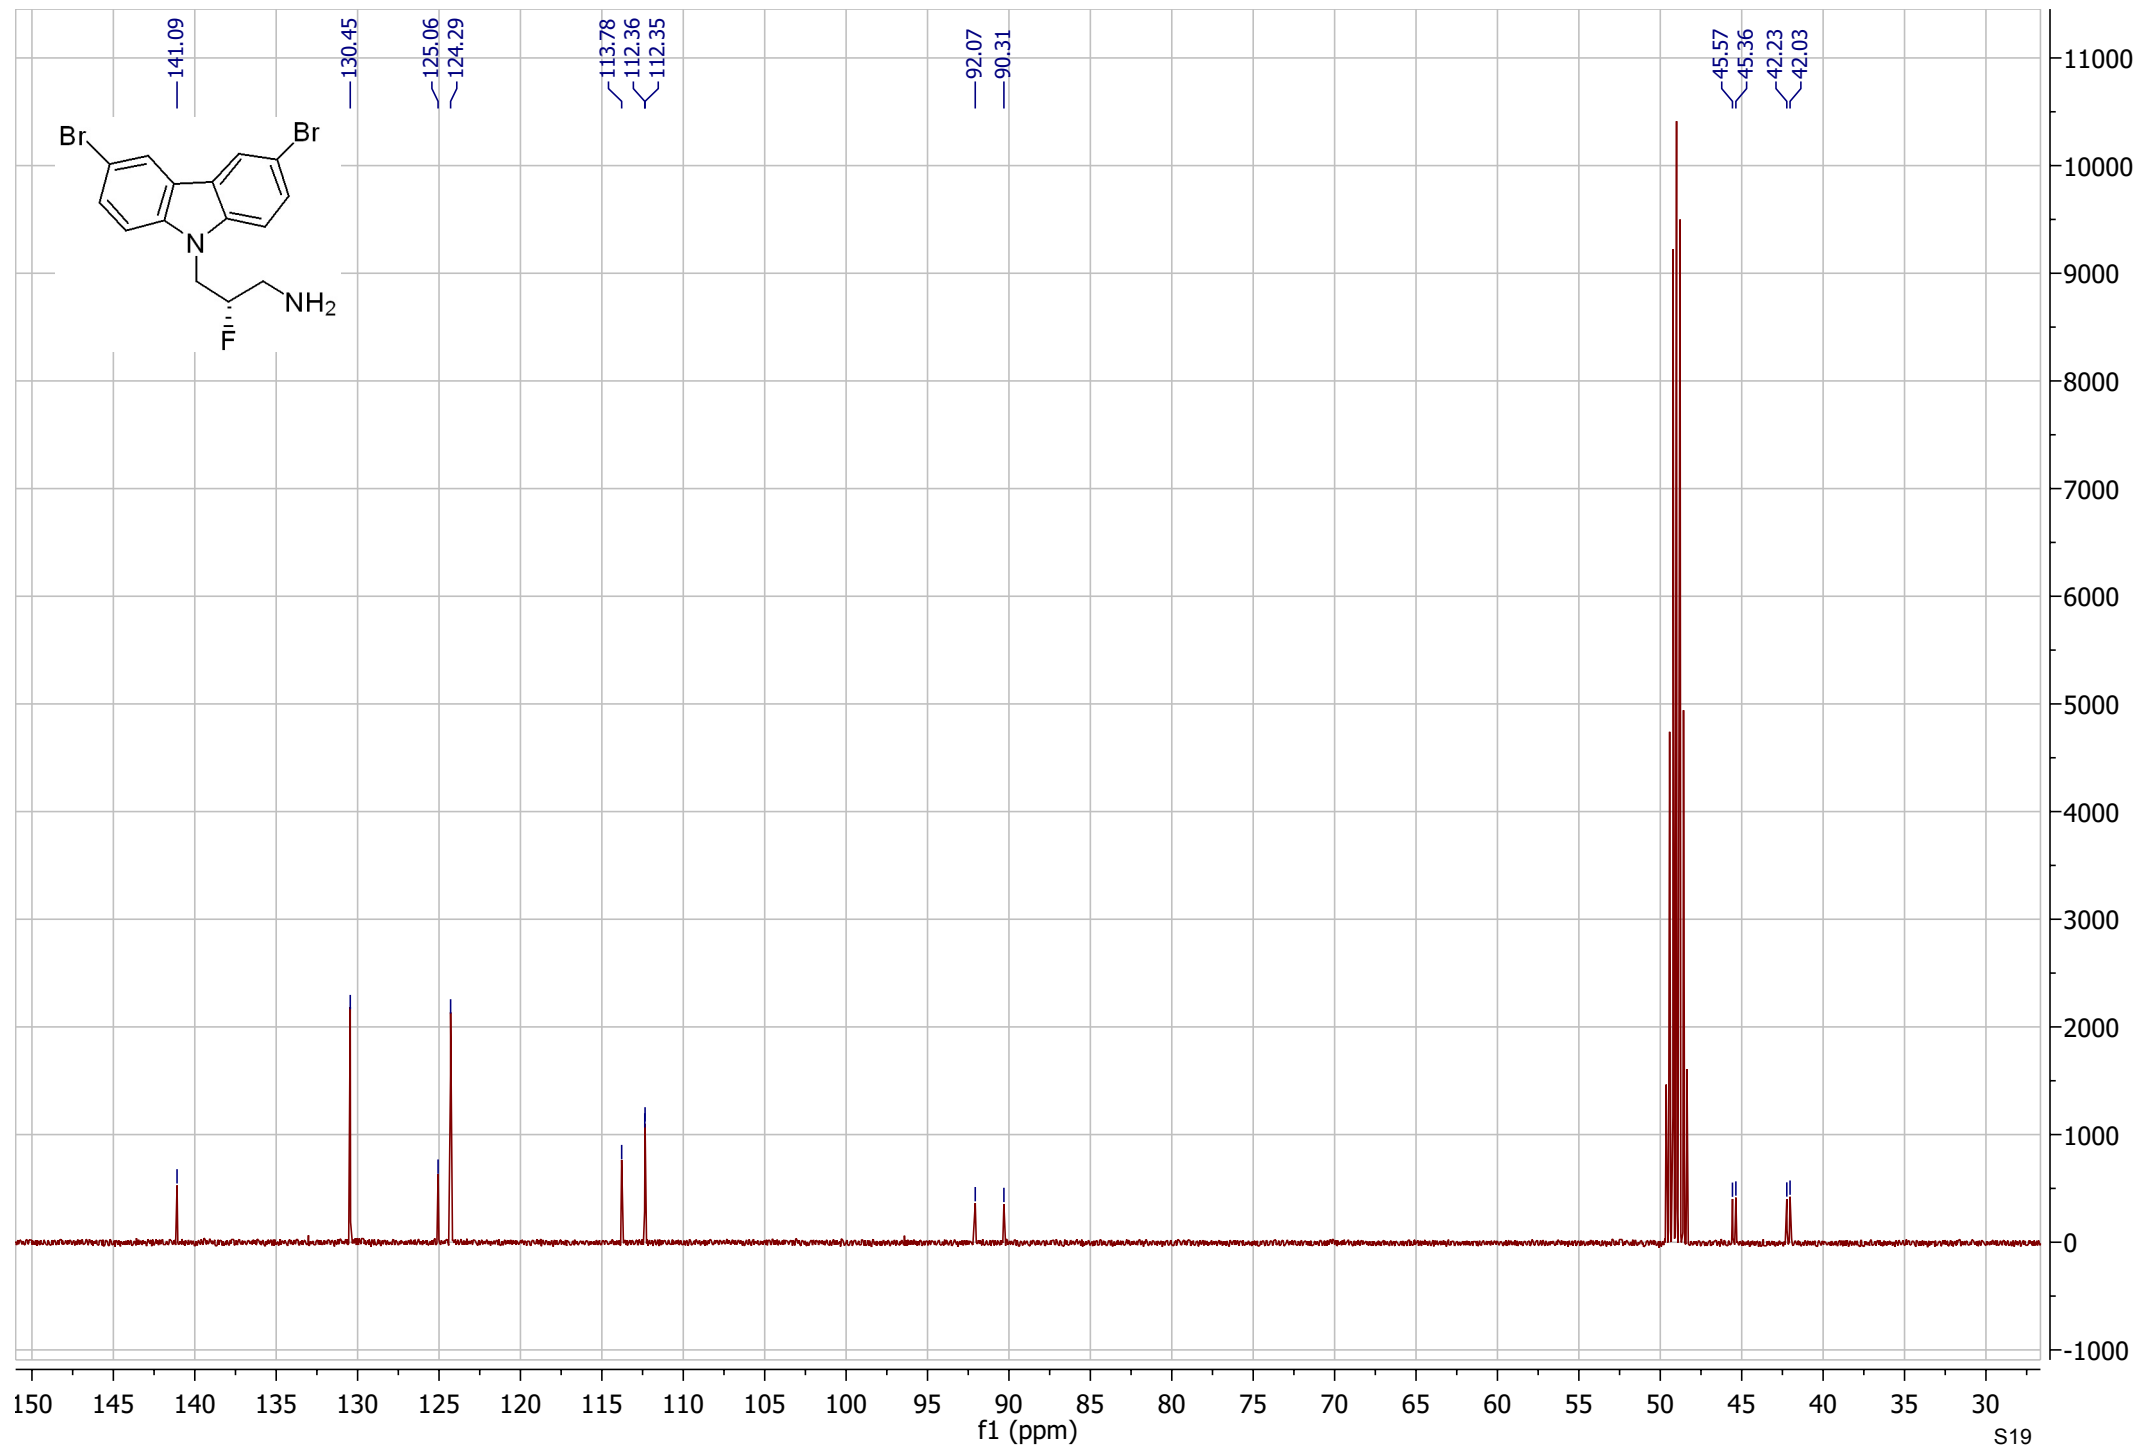

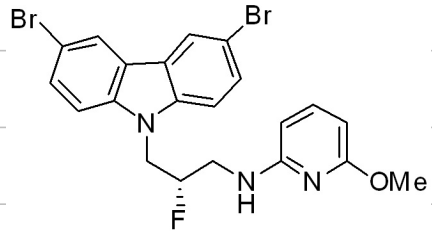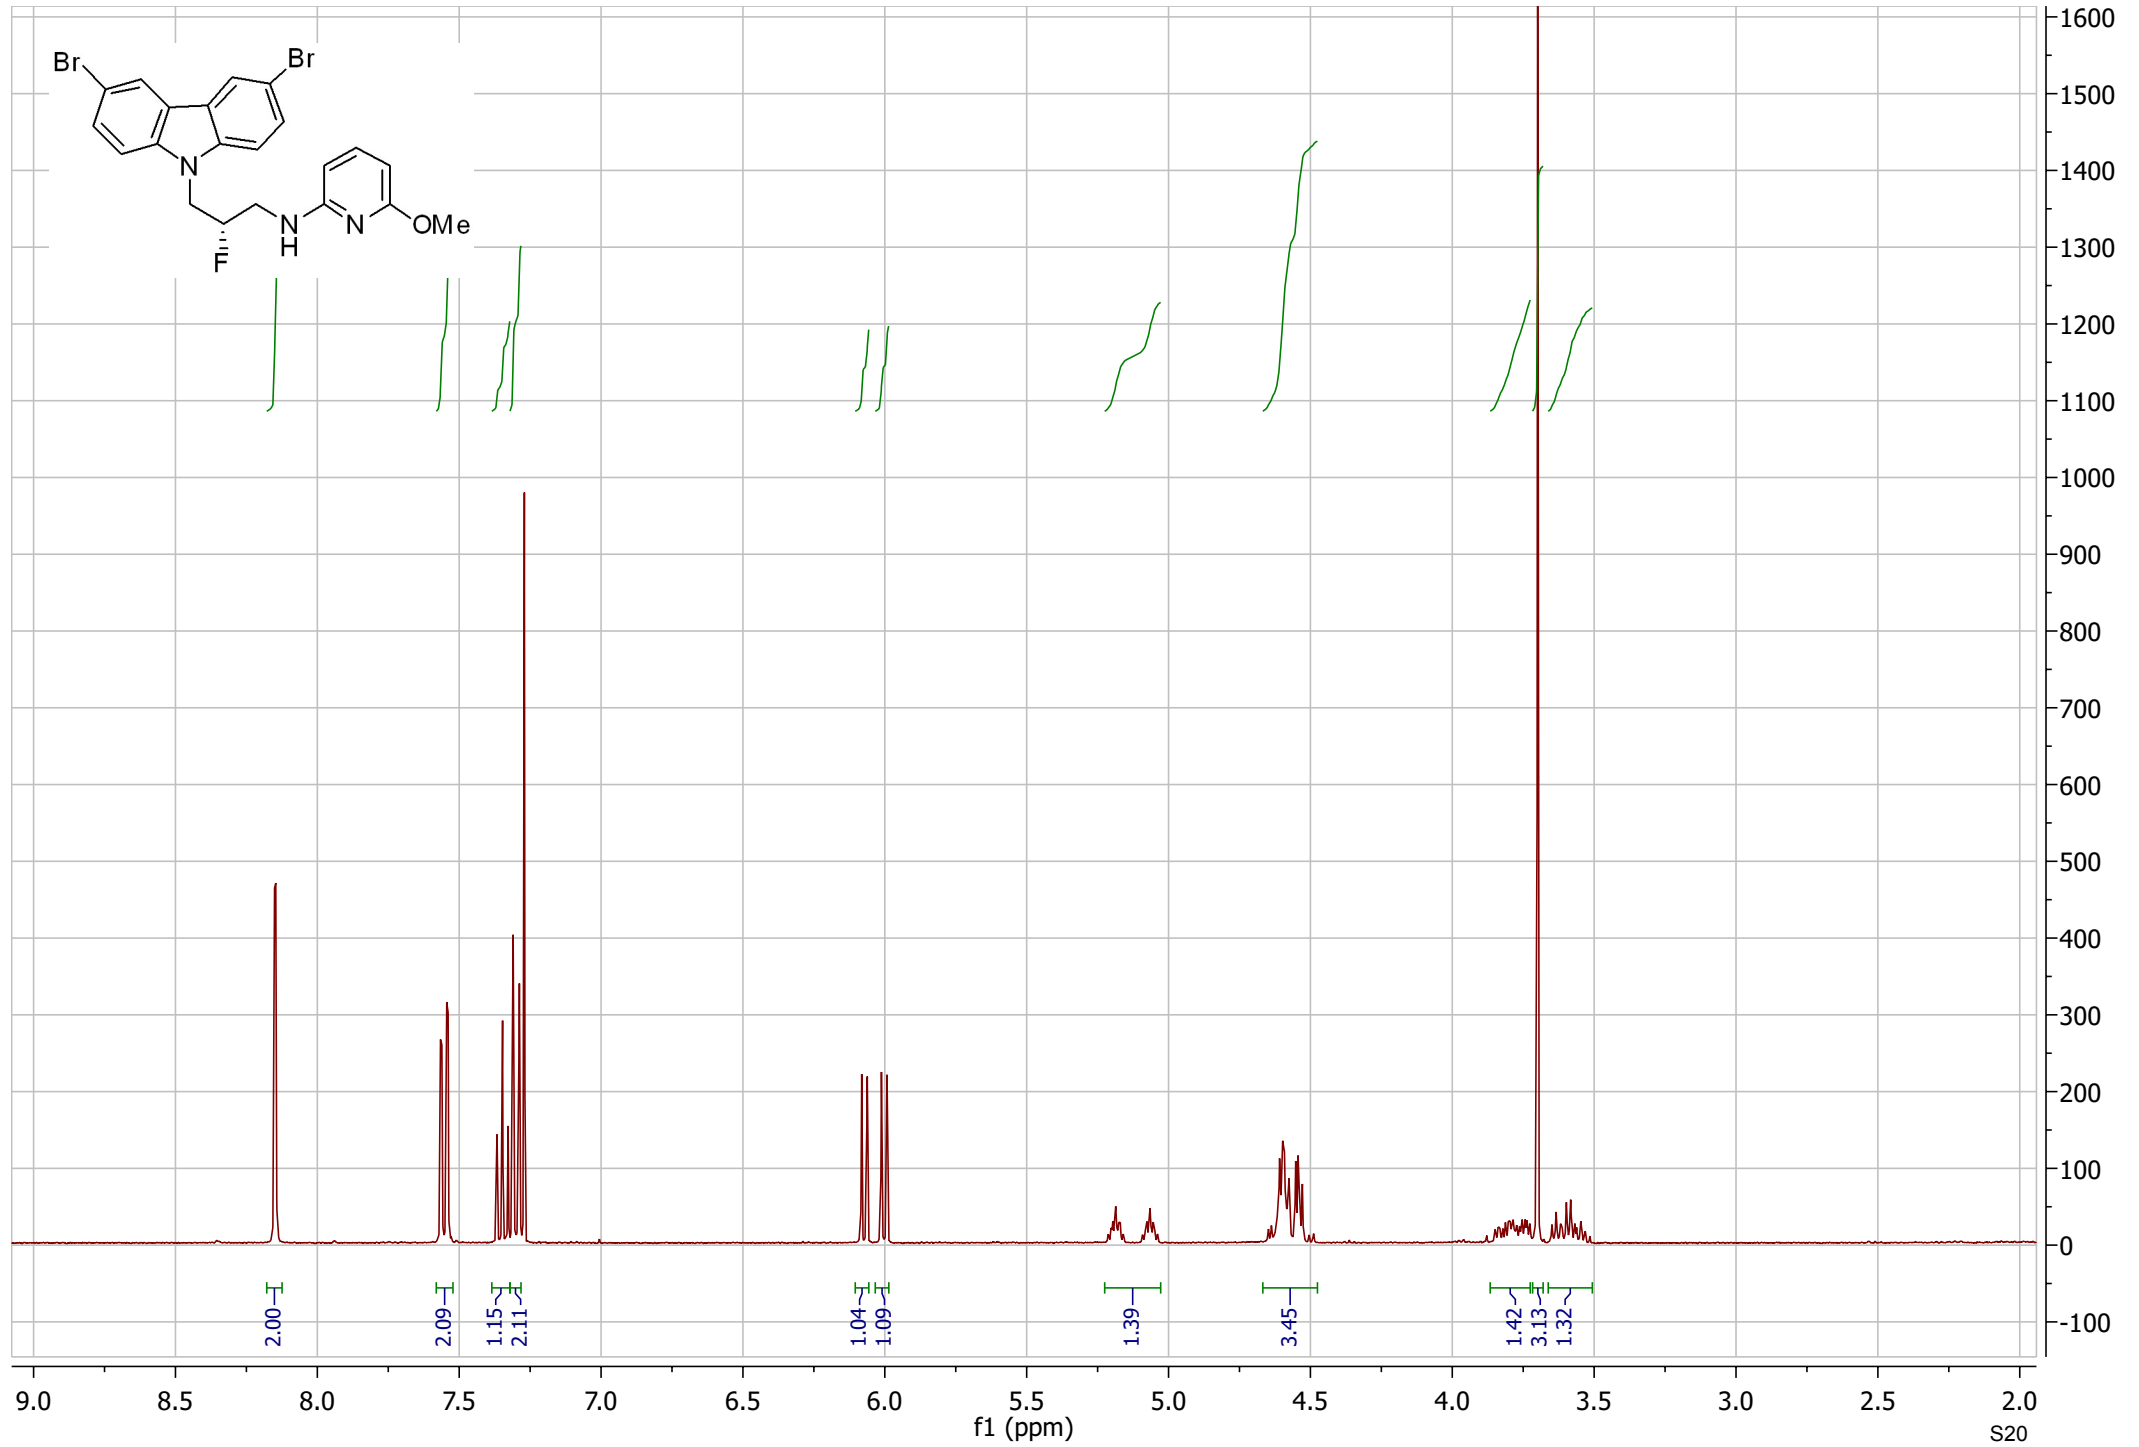

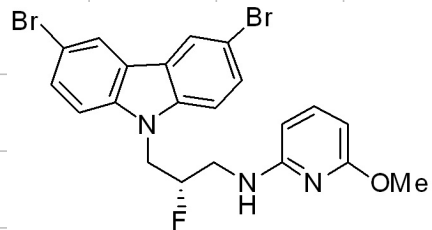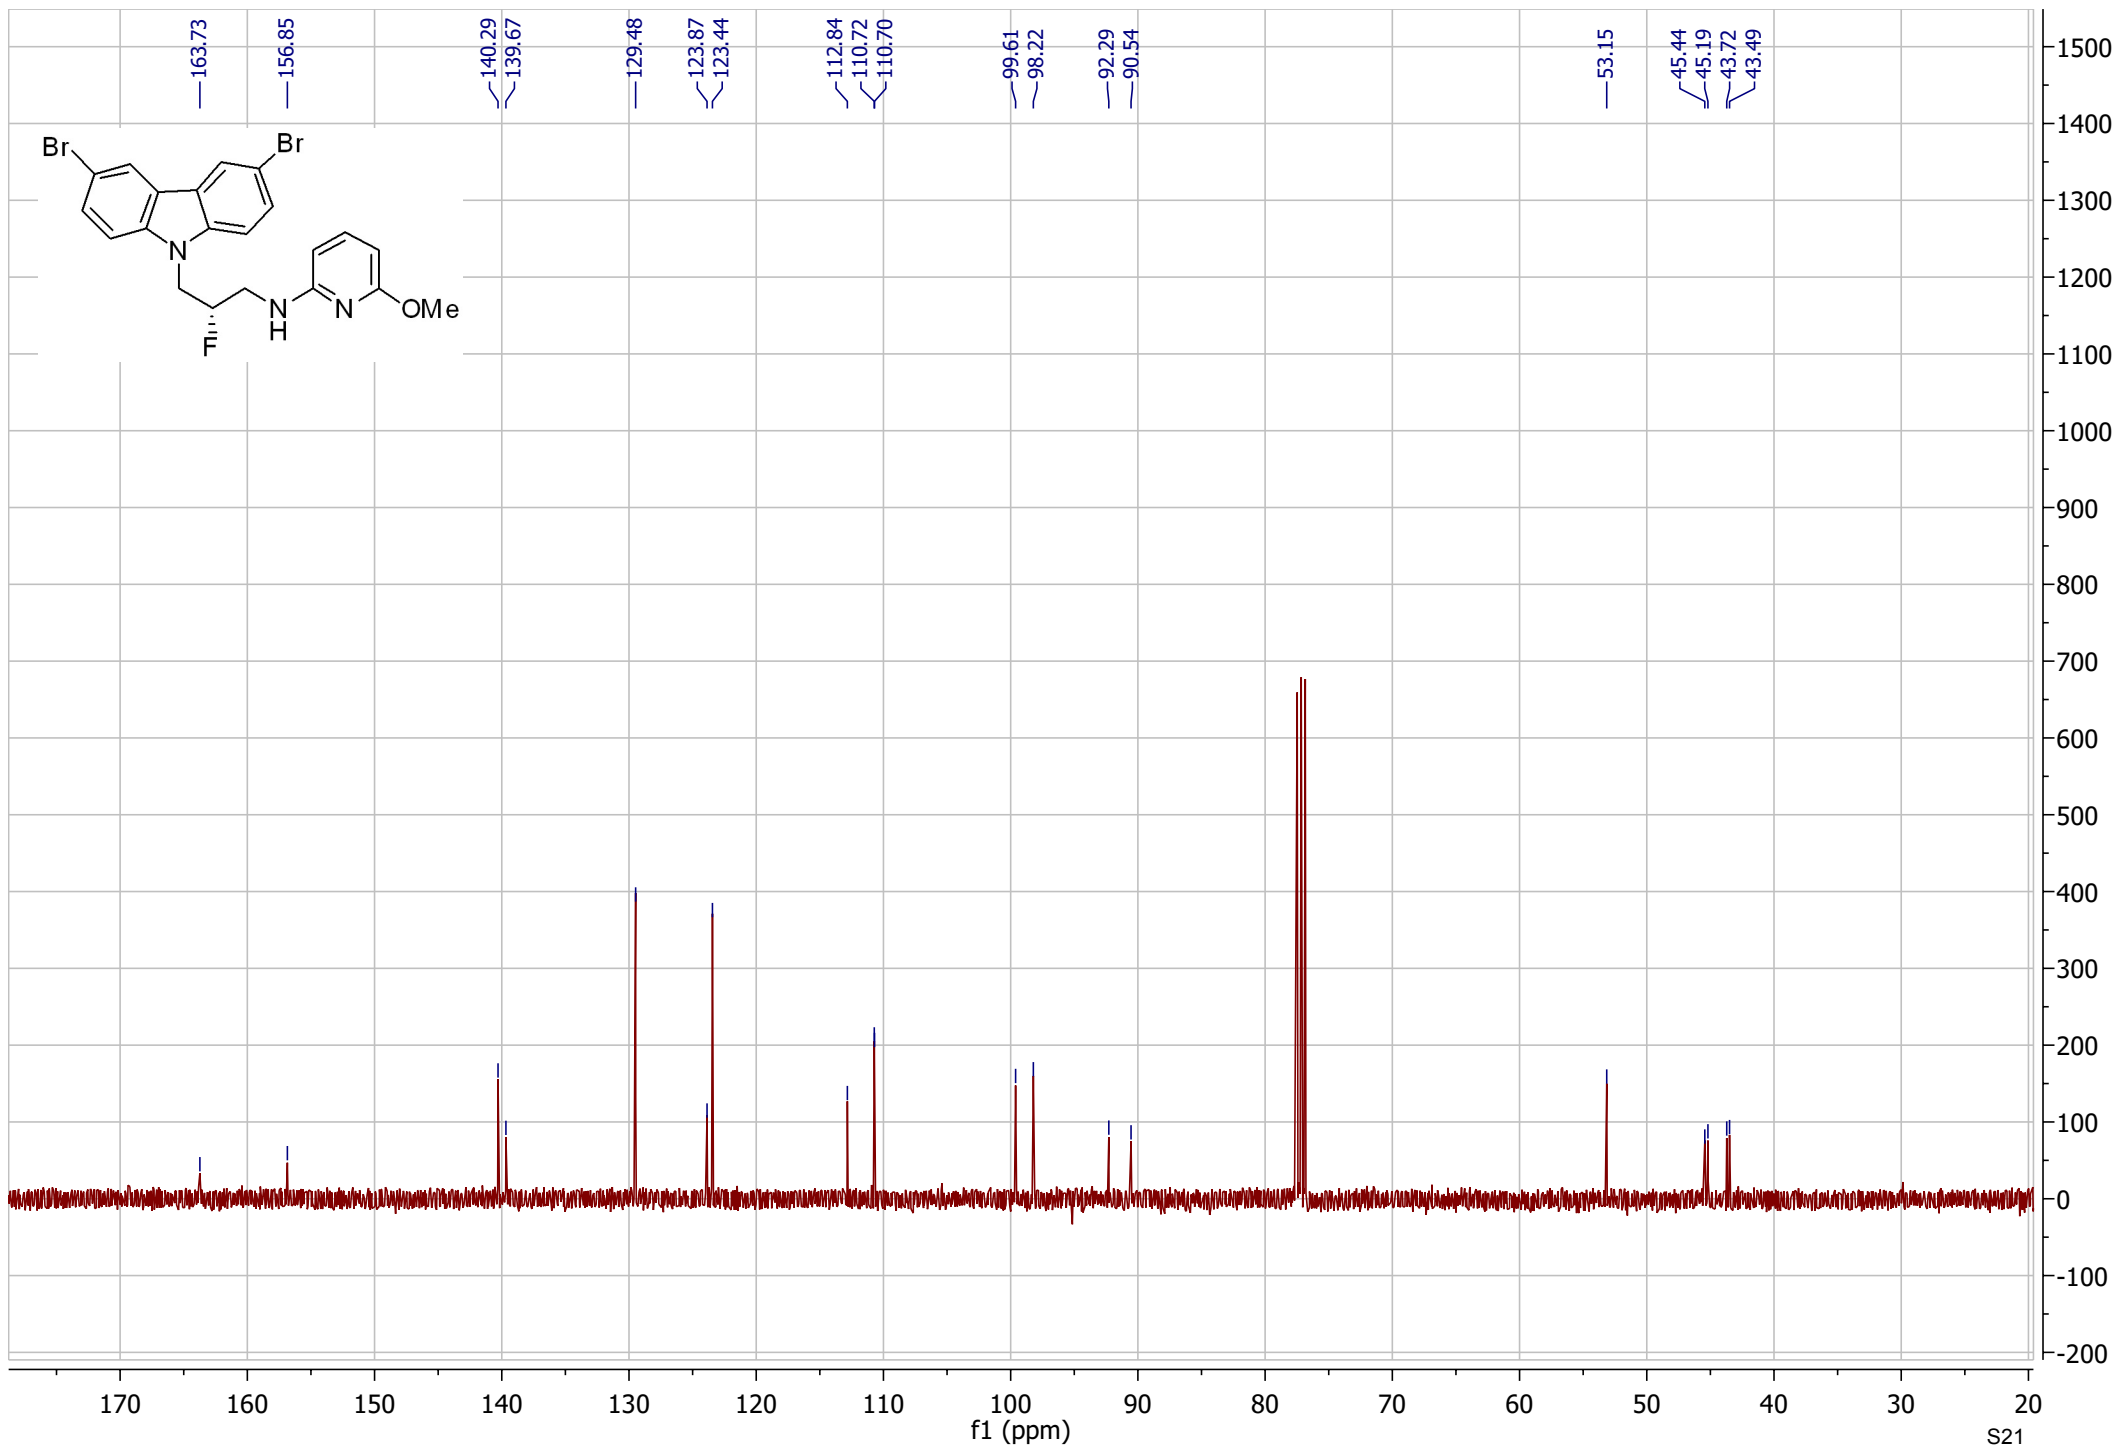

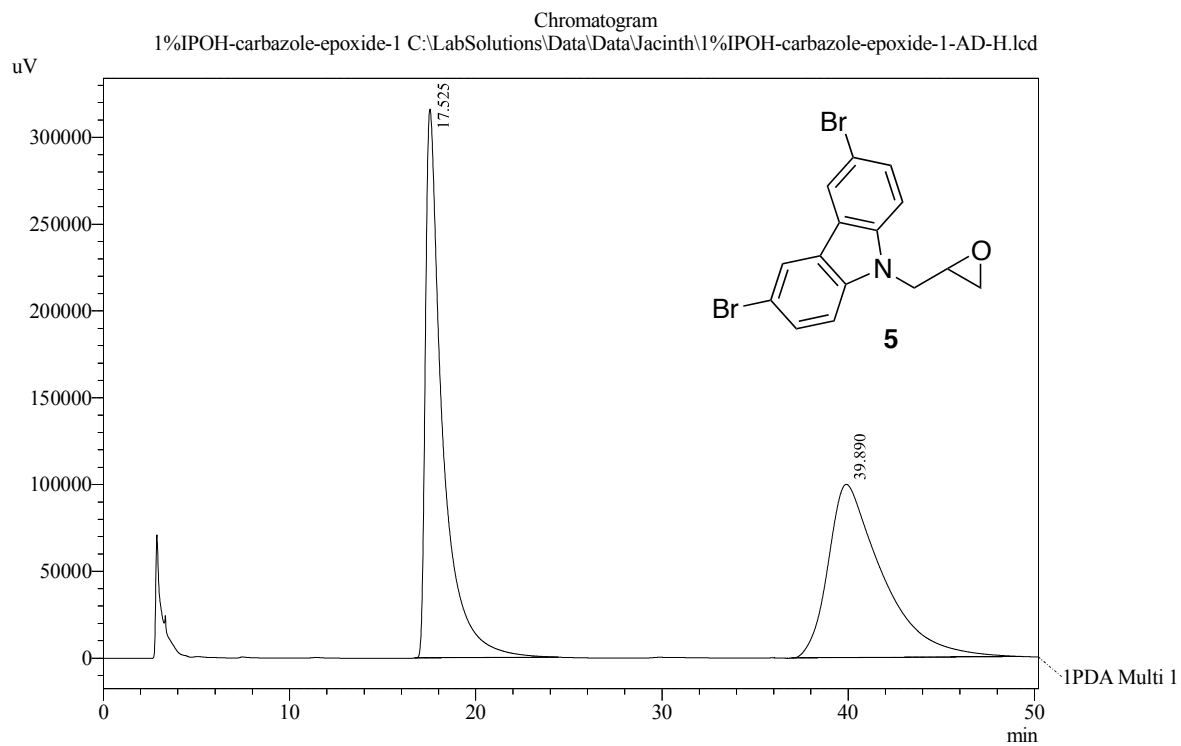

1 PDA Multi 1 / 254nm 4nm

PeakTable

PDA Ch1 254nm 4nm

| Peak# | Ret. Time | Area     | Height | Area %  |
|-------|-----------|----------|--------|---------|
| 1     | 17.525    | 20321801 | 316194 | 50.146  |
| 2     | 39.890    | 20203501 | 99840  | 49.854  |
| Total |           | 40525302 | 416035 | 100.000 |

Chromatogram  
 S321epoxide-jn-209-012 C:\LabSolutions\Data\Data\Jacinth\S321epoxide-jn-209-012-processed.lcd

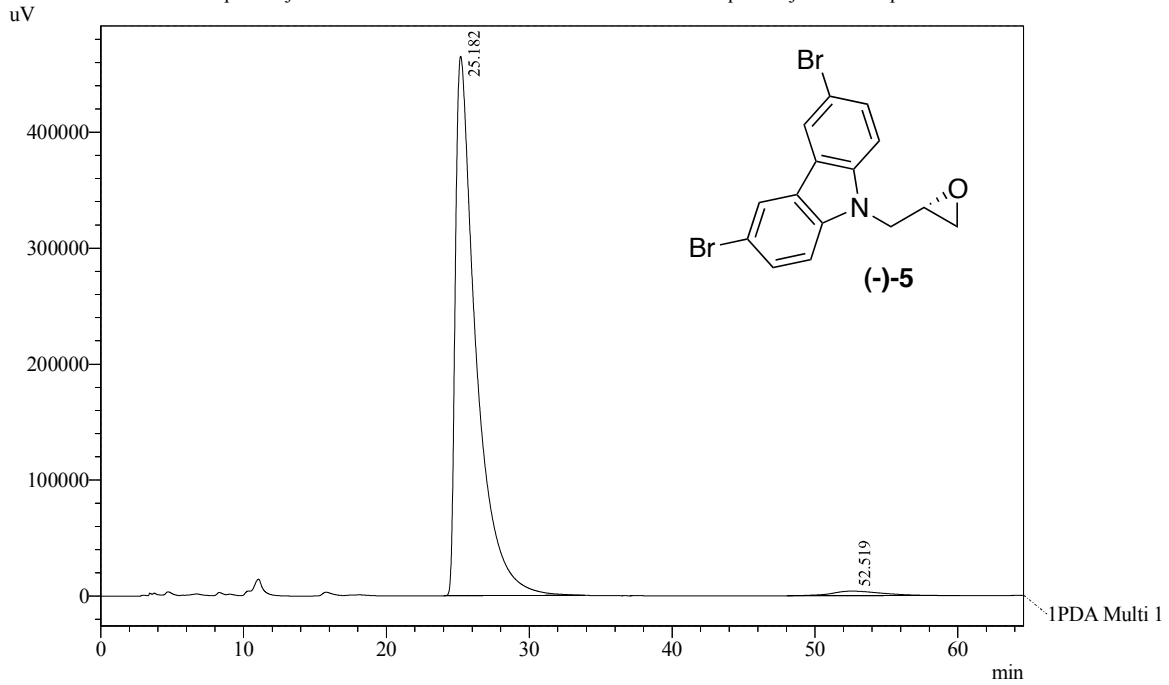

1 PDA Multi 1 / 254nm 4nm

PeakTable

PDA Ch1 254nm 4nm

| Peak# | Ret. Time | Area     | Height | Area %  |
|-------|-----------|----------|--------|---------|
| 1     | 25.182    | 46808223 | 465163 | 97.943  |
| 2     | 52.519    | 983006   | 3951   | 2.057   |
| Total |           | 47791229 | 469114 | 100.000 |

Chromatogram  
half%IPOH-fluorazide-jn-200-142-racemate-1 C:\LabSolutions\Data\Data\Jacinth\half%IPOH-fluorazide-jn-200-142-racemate-1-AD-H.lcd  
uV

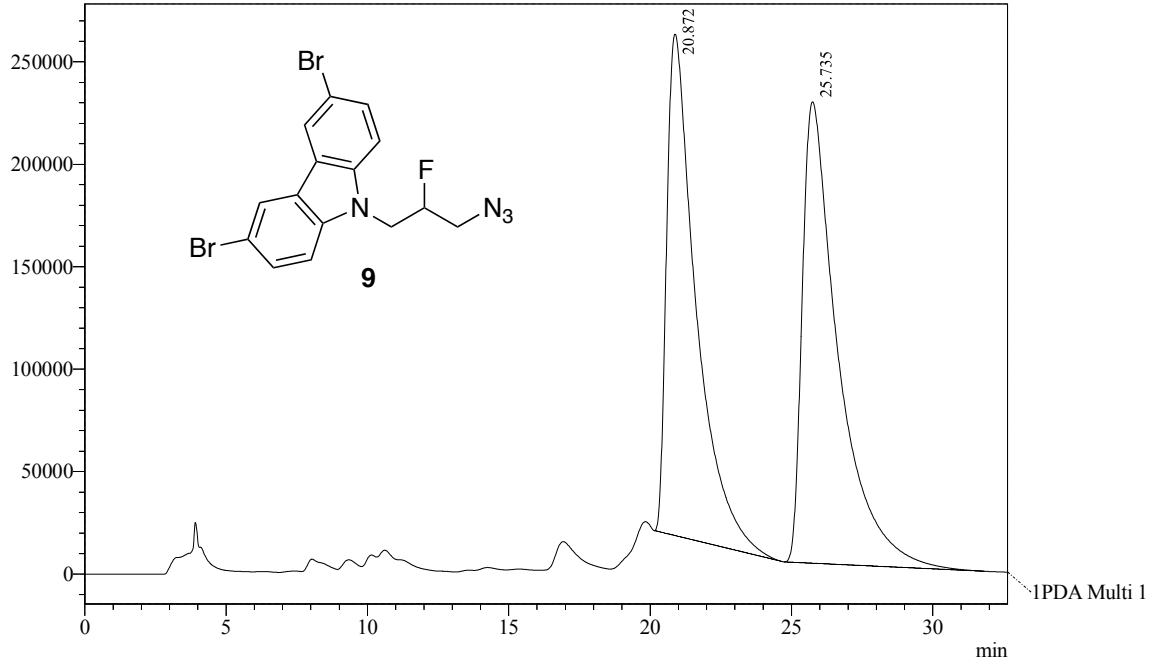

1 PDA Multi 1 / 254nm 4nm

PeakTable

PDA Ch1 254nm 4nm

| Peak# | Ret. Time | Area     | Height | Area %  |
|-------|-----------|----------|--------|---------|
| 1     | 20.872    | 17694311 | 244750 | 47.158  |
| 2     | 25.735    | 19826767 | 225140 | 52.842  |
| Total |           | 37521078 | 469891 | 100.000 |



Chromatogram  
 S321fluoroazide-jn-209-016 C:\LabSolutions\Data\Data\Jacinth\S321fluoroazide-jn-209-016-processed.lcd

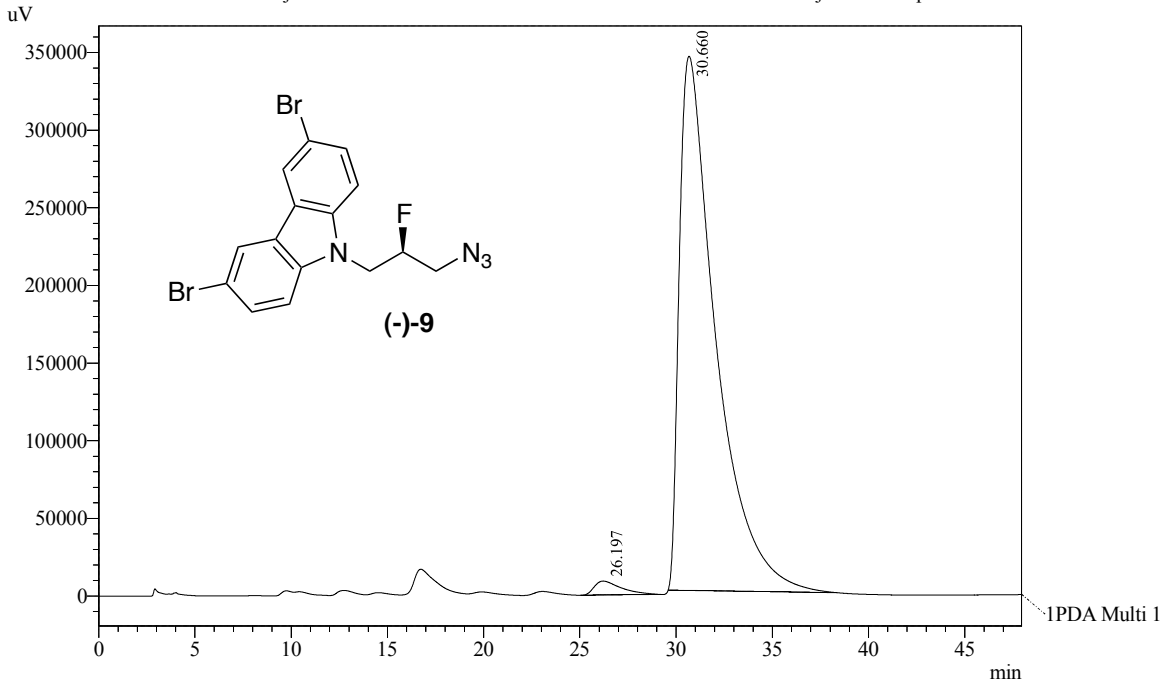

PeakTable

PDA Ch1 254nm 4nm

| Peak# | Ret. Time | Area     | Height | Area %  |
|-------|-----------|----------|--------|---------|
| 1     | 26.197    | 889619   | 9048   | 1.920   |
| 2     | 30.660    | 45447952 | 343951 | 98.080  |
| Total |           | 46337571 | 352999 | 100.000 |

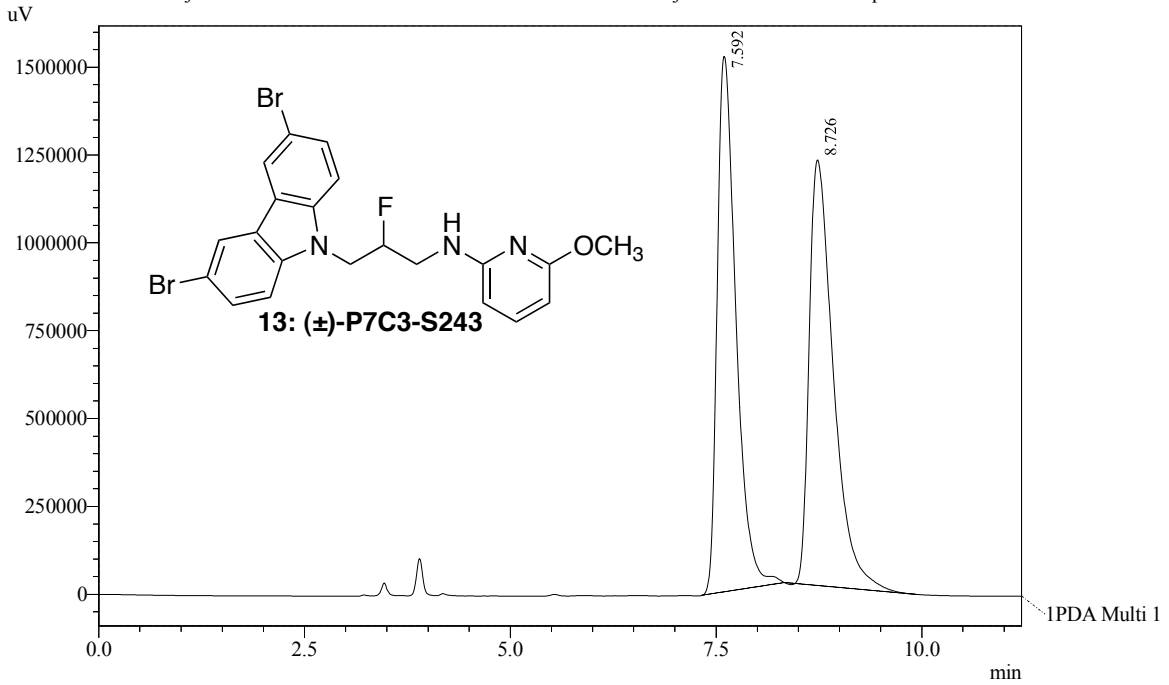

1 PDA Multi 1 / 254nm 4nm

PeakTable

PDA Ch1 254nm 4nm

| Peak# | Ret. Time | Area     | Height  | Area %  |
|-------|-----------|----------|---------|---------|
| 1     | 7.592     | 24279294 | 1524959 | 49.520  |
| 2     | 8.726     | 24749758 | 1211408 | 50.480  |
| Total |           | 49029052 | 2736367 | 100.000 |

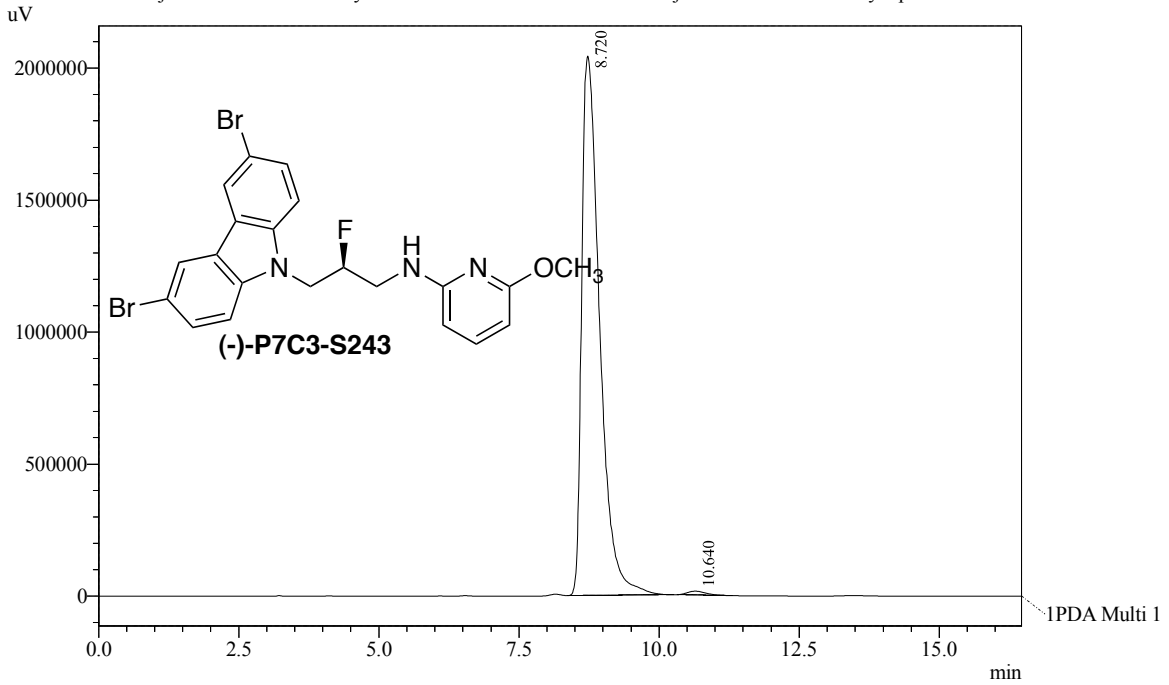

1 PDA Multi 1 / 254nm 4nm

PeakTable

PDA Ch1 254nm 4nm

| Peak# | Ret. Time | Area     | Height  | Area %  |
|-------|-----------|----------|---------|---------|
| 1     | 8.720     | 45635033 | 2042657 | 99.256  |
| 2     | 10.640    | 341903   | 14661   | 0.744   |
| Total |           | 45976936 | 2057317 | 100.000 |
